# Supplementary material for: Polyploidy Did Not Predate the Evolution of Nodulation in All Legumes
Source: PLoS One. 2010 Jul 16;5(7):e11630. doi: 10.1371/journal.pone.0011630 (PMC2905438; doi:10.1371/journal.pone.0011630)
Supplement: Table S2 — Automated counts of patterns found in 1,249 informative phylogenetic trees. The indicated patterns are simplified text representations of phylogenetic tree topologies. The enumerated counts include all variants consistent with models H1a, H1b, H2a, H2b, allowing up to four missing sequence from the full “canonical” patterns. For example, ((((G,G),M),((G,G),M)),C) is the representation of model H1a, assuming outgroup rooting by either Vv or other multi-species clades. Clades in all trees were first modified where necessary to ensure that variants such as ((G,G),M) and (M,(G,G)) were both counted. (0.05 MB XLS) [file pone.0011630.s002.xls]

## Sheet: counts_all
SIMPLE COUNTS
C	1637
M	1877
G	4431
V	1916
(C,C)	49
(M,M)	190
(G,G)	1749
(V,V)	68
			Observed			Expected			Exp-Obs			Sum	Countif sum E-0 = …
Model 1a			G	M	C	G	M	C	G	M	C	E-O	0	1	2	3	4
((((G,G),M),((G,G),M)),C)	11		4	2	1	4	2	1	0	0	0	0	11
((((G,G),M),(G,G)),C)	25		4	1	1	4	2	1	0	1	0	1		25
((((G,G),M),(G,M)),C)	1		3	2	1	4	2	1	1	0	0	1		1
((((G,G),M),G),C)	6		3	1	1	4	2	1	1	1	0	2			6
((((G,G),M),M),C)	6		2	2	1	4	2	1	2	0	0	2			6
(((G,G),((G,G),M)),C)	31		4	1	1	4	2	1	0	1	0	1		31
(((G,M),((G,G),M)),C)	5		3	2	1	4	2	1	1	0	0	1		5
((G,((G,G),M)),C)	9		3	1	1	4	2	1	1	1	0	2			9
(((G,M),(G,M)),C)	1		2	2	1	4	2	1	2	0	0	2			1
(((G,G),(G,M)),C)	6		3	1	1	4	2	1	1	1	0	2			6
((G,(G,M)),C)	19		2	1	1	4	2	1	2	1	0	3				19
(((G,M),(G,G)),C)	8		3	1	1	4	2	1	1	1	0	2			8
(((G,M),G),C)	3		2	1	1	4	2	1	2	1	0	3				3
SUM	131												11	62	36	22	0
Model 1b
((((G,G),M),((G,G),M)),(C,C))	0		4	2	2	4	2	2	0	0	0	0	0
((((G,G),M),(G,G)),(C,C))	0		4	1	2	4	2	2	0	1	0	1		0
((((G,G),M),(G,M)),(C,C))	0		3	2	2	4	2	2	1	0	0	1		0
((((G,G),M),G),(C,C))	0		3	1	2	4	2	2	1	1	0	2			0
((((G,G),M),M),(C,C))	1		2	2	2	4	2	2	2	0	0	2			1
(((G,G),((G,G),M)),(C,C))	0		4	1	2	4	2	2	0	1	0	1		0
(((G,M),((G,G),M)),(C,C))	0		3	2	2	4	2	2	1	0	0	1		0
((G,((G,G),M)),(C,C))	1		3	1	2	4	2	2	1	1	0	2			1
((M,((G,G),M)),(C,C))	0		2	2	2	4	2	2	2	0	0	2			0
(((G,M),(G,M)),(C,C))	0		2	2	2	4	2	2	2	0	0	2			0
(((G,G),(G,M)),(C,C))	1		3	1	2	4	2	2	1	1	0	2			1
((G,(G,M)),(C,C))	0		2	1	2	4	2	2	2	1	0	3				0
(((G,M),(G,G)),(C,C))	0		3	1	2	4	2	2	1	1	0	2			0
(((G,M),G),(C,C))	0		2	1	2	4	2	2	2	1	0	3				0
SUM	3												0	0	3	0	0
Model 2a
((((G,G),M),C),(((G,G),M),C))	3		4	2	2	4	2	2	0	0	0	0	3
(((G,M),C),(((G,G),M),C))	0		3	2	2	4	2	2	1	0	0	1		0
((((G,G),M),C),((G,M),C))	0		3	2	2	4	2	2	1	0	0	1		0
(((G,M),C),((G,M),C))	0		2	2	2	4	2	2	2	0	0	2			0
(((G,G),C),(((G,G),M),C))	0		4	1	2	4	2	2	0	1	0	1		0
((((G,G),M),C),((G,G),C))	0		4	1	2	4	2	2	0	1	0	1		0
((G,C),(((G,G),M),C))	0		3	1	2	4	2	2	1	1	0	2			0
((((G,G),M),C),(G,C))	0		3	1	2	4	2	2	1	1	0	2			0
((G,C),((G,M),C))	1		2	1	2	4	2	2	2	1	0	3				1
(((G,M),C),(G,C))	0		2	1	2	4	2	2	2	1	0	3				0
((M,C),((G,G),C))	1		2	1	2	4	2	2	2	1	0	3				1
(((G,G),C),(M,C))	2		2	1	2	4	2	2	2	1	0	3				2
(((G,G),M),(((G,G),M),C))	6		4	2	1	4	2	2	0	0	1	1		6
((G,M),(((G,G),M),C))	1		3	2	1	4	2	2	1	0	1	2			1
(((G,G),M),((G,M),C))	0		3	2	1	4	2	2	1	0	1	2			0
((G,G),(((G,G),M),C))	11		4	1	1	4	2	2	0	1	1	2			11
(((G,G),M),((G,G),C))	6		4	1	1	4	2	2	0	1	1	2			6
((((G,G),M),C),((G,G),M))	3		4	2	1	4	2	2	0	0	1	1		3
(((G,M),C),((G,G),M))	0		3	2	1	4	2	2	1	0	1	2			0
((((G,G),M),C),(G,M))	1		3	2	1	4	2	2	1	0	1	2			1
(((G,G),C),((G,G),M))	1		4	1	1	4	2	2	0	1	1	2			1
((((G,G),M),C),(G,G))	10		4	1	1	4	2	2	0	1	1	2			10
SUM	46												3	9	30	4	0
Model 2b
((((G,G),M),(C,C)),(((G,G),M),C))	0		4	2	3	4	2	4	0	0	1	1		0
(((G,M),(C,C)),(((G,G),M),C))	0		3	2	3	4	2	4	1	0	1	2			0
((((G,G),M),(C,C)),((G,M),C))	0		3	2	3	4	2	4	1	0	1	2			0
(((G,M),(C,C)),((G,M),C))	0		2	2	3	4	2	4	2	0	1	3				0
(((G,G),(C,C)),(((G,G),M),C))	0		4	1	3	4	2	4	0	1	1	2			0
((((G,G),M),(C,C)),((G,G),C))	0		4	1	3	4	2	4	0	1	1	2			0
((G,(C,C)),(((G,G),M),C))	0		3	1	3	4	2	4	1	1	1	3				0
((((G,G),M),(C,C)),(G,C))	0		3	1	3	4	2	4	1	1	1	3				0
((G,(C,C)),((G,M),C))	0		2	1	3	4	2	4	2	1	1	4					0
(((G,M),(C,C)),(G,C))	0		2	1	3	4	2	4	2	1	1	4					0
((M,(C,C)),((G,G),C))	0		2	1	3	4	2	4	2	1	1	4					0
(((G,G),(C,C)),(M,C))	0		2	1	3	4	2	4	2	1	1	4					0
(((G,G),M),(((G,G),M),(C,C)))	0		4	2	2	4	2	4	0	0	2	2			0
((G,M),(((G,G),M),(C,C)))	0		3	2	2	4	2	4	1	0	2	3				0
(((G,G),M),((G,M),(C,C)))	0		3	2	2	4	2	4	1	0	2	3				0
((G,G),(((G,G),M),(C,C)))	0		4	1	2	4	2	4	0	1	2	3				0
(((G,G),M),((G,G),(C,C)))	0		4	1	2	4	2	4	0	1	2	3				0
((((G,G),M),(C,C)),((G,G),M))	0		4	2	2	4	2	4	0	0	2	2			0
(((G,M),(C,C)),((G,G),M))	0		3	2	2	4	2	4	1	0	2	3				0
((((G,G),M),(C,C)),(G,M))	0		3	2	2	4	2	4	1	0	2	3				0
(((G,G),(C,C)),((G,G),M))	0		4	1	2	4	2	4	0	1	2	3				0
((((G,G),M),(C,C)),(G,G))	0		4	1	2	4	2	4	0	1	2	3				0
((((G,G),M),C),(((G,G),M),(C,C)))	0		4	2	3	4	2	4	0	0	1	1		0
(((G,M),C),(((G,G),M),(C,C)))	0		3	2	3	4	2	4	1	0	1	2			0
((((G,G),M),C),((G,M),(C,C)))	0		3	2	3	4	2	4	1	0	1	2			0
(((G,M),C),((G,M),(C,C)))	0		2	2	3	4	2	4	2	0	1	3				0
(((G,G),C),(((G,G),M),(C,C)))	0		4	1	3	4	2	4	0	1	1	2			0
((((G,G),M),C),((G,G),(C,C)))	0		4	1	3	4	2	4	0	1	1	2			0
((G,C),(((G,G),M),(C,C)))	0		3	1	3	4	2	4	1	1	1	3				0
((((G,G),M),C),(G,(C,C)))	0		3	1	3	4	2	4	1	1	1	3				0
((G,C),((G,M),(C,C)))	0		2	1	3	4	2	4	2	1	1	4					0
(((G,M),C),(G,(C,C)))	0		2	1	3	4	2	4	2	1	1	4					0
((M,C),((G,G),(C,C)))	0		2	1	3	4	2	4	2	1	1	4					0
(((G,G),C),(M,(C,C)))	0		2	1	3	4	2	4	2	1	1	4					0
((((G,G),M),(C,C)),(((G,G),M),(C,C)))	0		4	2	4	4	2	4	0	0	0	0	0
(((G,M),(C,C)),(((G,G),M),(C,C)))	0		3	2	4	4	2	4	1	0	0	1		0
((((G,G),M),(C,C)),((G,M),(C,C)))	0		3	2	4	4	2	4	1	0	0	1		0
(((G,M),(C,C)),((G,M),(C,C)))	0		2	2	4	4	2	4	2	0	0	2			0
(((G,G),(C,C)),(((G,G),M),(C,C)))	0		4	1	4	4	2	4	0	1	0	1		0
((((G,G),M),(C,C)),((G,G),(C,C)))	0		4	1	4	4	2	4	0	1	0	1		0
((G,(C,C)),(((G,G),M),(C,C)))	0		3	1	4	4	2	4	1	1	0	2			0
((((G,G),M),(C,C)),(G,(C,C)))	0		3	1	4	4	2	4	1	1	0	2			0
((G,(C,C)),((G,M),(C,C)))	0		2	1	4	4	2	4	2	1	0	3				0
(((G,M),(C,C)),(G,(C,C)))	0		2	1	4	4	2	4	2	1	0	3				0
((M,(C,C)),((G,G),(C,C)))	0		2	1	4	4	2	4	2	1	0	3				0
(((G,G),(C,C)),(M,(C,C)))	0		2	1	4	4	2	4	2	1	0	3				0
SUM	0												0	0	0	0	0
