# Supplementary material for: Polyploidy Did Not Predate the Evolution of Nodulation in All Legumes
Source: PLoS One. 2010 Jul 16;5(7):e11630. doi: 10.1371/journal.pone.0011630 (PMC2905438; doi:10.1371/journal.pone.0011630)
Supplement: Table S3 — Manual counts of patterns found in 1,249 informative phylogenetic trees. Columns D-G show the numbers of sequences missing relative to the canonical pattern for the indicated model (H1a … H2b). (0.25 MB XLS) [file pone.0011630.s003.xls]

## Sheet: manual counts
Clade #	filename	H1a	H1b	H1a	H2b	All	topology	C	G	M	V	note1	note2
1a	cl10016	-3				-3	(((C1,(V1,((G1,G2),(M1,(G3,(G4,(((((G5,G6),M2),C2),(V2,V3)),G7))))))),C3),V4);	1	2	1	2
2	cl1002						((((G1,G2),C1),M1),V1);	1	2	1	1
3	cl10023						((V1,(((((C1,C2),((G1,G2),((((M1,M2),M3),G3),M4))),C3),V2),V3)),V4);	3	3	4	4
4	cl10032	-3				-3	((V1,(((G1,G2),M1),C1)),V2);	1	2	1	2
5	cl10046	-2				-2	(((G1,((G2,G3),M1)),C1),V1);	1	3	1	1
6	cl10059	-3				-3	((((G1,G2),M1),C1),V1);	1	2	1	1
7	cl10063	-3				-3	((((G1,G2),M1),C1),V1);	1	2	1	1
8	cl10084	-1				-1	(((((M1,M2),(G1,(G2,G3))),(G4,G5)),C1),V1);	1	5	2	1	extra G&M
9a	cl1009	-3				-3	(((V1,((G1,(G2,M1)),C1)),(G3,M2)),V2);	1	2	1	2
10	cl10105	-1				-1	((((G1,G2),((G3,G4),M1)),C1),V1);	1	4	1	1	clean
11	cl10109	0				0	(((((G1,G2),M1),((G3,G4),M2)),C1),V1);	1	4	2	1	clean
12	cl10113						((G1,(G2,(((C1,C2),M1),C3))),V1);	3	2	1	1
13	cl10114						(((V1,V2),((G1,G2),(C1,(((G3,G4),M1),C2)))),V3);	2	4	1	3	rerooting could give H2a, -1
14	cl10118						((M1,(((G1,G2),C1),M2)),V1);	1	2	2	1
15	cl10119						((((M1,C1),(G1,G2)),V1),V2);	1	2	1	2
16	cl10122	-1				-1	((C1,(((G1,G2),M1),(G3,(G4,G5)))),V1);	1	5	1	1	extra G
17	cl10126						(((V1,((G1,G2),C1)),(((G3,G4),M1),(G5,G6))),V2);	1	6	1	2
18	cl10141	-3				-3	(((((G1,G2),M1),C1),V1),V2);	1	2	1	2
19	cl10160						((((((G1,G2),G3),M1),C1),C2),V1);	2	3	1	1
20	cl10161	0				0	((G1,(G2,(((V1,C1),((G3,G4),M1)),M2))),V2);	1	4	2	2	rerooting on other V gives H1a
21	cl10163	-1				-1	((V1,(((G1,G2),(G3,M1)),C1)),V2);	1	3	1	2
22	cl10166	-1				-1	(((((G1,G2),(G3,M1)),G4),C1),V1);	1	4	1	1	extra G
23	cl10176			-4		-4	(((((G1,G2),V1),C1),(((G3,G4),C2),M1)),V2);	2	4	1	2
24	cl1018	-3				-3	(((((G1,G2),(G3,G4)),M1),C1),V1);	1	4	1	1	tandem dups retained in G
25	cl10181	-3				-3	((((G1,G2),M1),C1),V1);	1	2	1	1
26	cl1019	-3				-3	(((((G1,G2),M1),C1),V1),V2);	1	2	1	2
27	cl10198	-3				-3	((((G1,G2),M1),C1),V1);	1	2	1	1
28	cl10201	-3				-3	((((G1,G2),M1),C1),V1);	1	2	1	1
29b	cl10209			-1		-1	((((G1,G2),(((G3,G4),C1),C2)),((V1,(((G5,G6),M1),(((G7,G8),M2),C3))),V2)),V3);	1	4	2	1	weak; just 1 C
30	cl10213		-2			-2	(((C1,C2),(G1,((G2,G3),M1))),V1);	2	3	1	1
31a	cl10220	-1				-1	((((((G1,M1),((G2,G3),M2)),C1),V1),(C2,(((G4,G5),M3),G6))),V2);	1	3	2	1
31b	cl10220	-2				-2	((((((G1,M1),((G2,G3),M2)),C1),V1),(C2,(((G4,G5),M3),G6))),V2);	1	3	1	1
32	cl10227	-1				-1	((((G1,G2),((G3,G4),M1)),C1),V1);	1	4	1	1
33	cl10235			-1		-1	((((G1,G2),M1),(((G3,G4),M2),C1)),V1);	1	4	2	1
34	cl10238	-3				-3	((((G1,G2),(M1,M2)),C1),V1);	1	2	2	1
35b	cl10239		0			0	(((V1,((G1,G2),C1)),((C2,C3),(((G3,G4),M1),((G5,G6),M2)))),V2);	2	4	2	2
36	cl10256	-3				-3	(((((G1,G2),M1),G3),C1),V1);	1	3	1	1
37	cl10270	-3				-3	((((G1,G2),M1),C1),V1);	1	2	1	1
38	cl10280						((((G1,G2),M1),(((G3,G4),C1),V1)),V2);	1	4	1	2
39	cl10285						(((G1,C1),(G2,M1)),V1);	1	2	1	1
40a	cl10287	-1				-1	((((((G1,G2),((G3,G4),M1)),C1),V1),((((G5,G6),M2),(G7,G8)),((((V2,((G9,G10),((G11,G12),M3))),((V3,((G13,G14),(G15,G16))),(M4,(((G17,V4),(G18,G19)),G20)))),V5),((G21,G22),(V6,C2))))),V7);	1	4	1	1
41	cl1030	-3				-3	((((G1,G2),M1),C1),V1);	1	2	1	1
42	cl10302	-3				-3	((((G1,G2),M1),C1),V1);	1	2	1	1
43	cl10309	-1				-1	((C1,(((G1,G2),(G3,G4)),M1)),V1);	1	4	1	1
44a	cl10314			-3		-3	(((V1,(((G1,G2),C1),(G3,G4))),(((G5,G6),((G7,G8),M1)),C2)),V2);	2	8	1	2
44b	cl10314	-1				-1	(((V1,(((G1,G2),C1),(G3,G4))),(((G5,G6),((G7,G8),M1)),C2)),V2);	2	8	1	2
45	cl10324	0				0	((C1,((((G1,G2),M1),((G3,G4),M2)),C2)),V1);	2	4	2	1	extra C
46	cl10332			-4		-4	(((M1,M2),((G1,G2),C1)),V1);	1	2	2	1
47	cl10390						((((G1,G2),(M1,((G3,((G4,G5),M2)),((G6,M3),M4)))),C1),V1);	1	6	4	1
48	cl10410	-3				-3	((((G1,G2),M1),C1),V1);	1	2	1	1
49	cl10451						((((G1,((G2,G3),G4)),((G5,M1),C1)),V1),V2);	1	5	1	2
50	cl10454						(((V1,V2),(((((V3,(V4,(V5,V6))),G1),G2),M1),(((((V7,V8),((V9,(V10,V11)),V12)),((G3,M2),(V13,G4))),V14),((((G5,G6),((((G7,(G8,G9)),(G10,G11)),(((G12,(G13,(G14,G15))),G16),G17)),((G18,G19),((G20,G21),G22)))),((M3,M4),M5)),C1)))),V15);	1	22	5	15	lots of tandem duplication
51	cl10464			-4		-4	(((M1,M2),((G1,G2),C1)),V1);	1	2	2	1
52	cl10485	-3				-3	((((G1,G2),(M1,M2)),C1),V1);	1	2	2	1	extra M
53	cl10489	0				0	(((((G1,G2),(((G3,G4),M1),M2)),((G5,C1),C2)),V1),V2);	2	5	2	2	G&M mis-ordered
54	cl1050	-3				-3	((((G1,G2),M1),C1),V1);	1	2	1	1
55	cl10500			-4		-4	((((G1,G2),C1),M1),V1);	1	2	1	1
56	cl10513						(((((C1,(((G1,G2),M1),C2)),V1),((G3,M2),(C3,C4))),G4),V2);	4	4	2	2
57	cl10528			-2		-2	((((G1,G2),M1),((G3,G4),C1)),V1);	1	4	1	1
58	cl10549						((((G1,G2),(G3,((M1,M2),M3))),(((G4,(G5,G6)),C1),M4)),V1);	1	6	4	1
59	cl10570	-3				-3	((((G1,G2),M1),C1),V1);	1	2	1	1
60	cl10578	-3				-3	((((G1,G2),M1),C1),V1);	1	2	1	1
61	cl10594	-3				-3	((((G1,G2),M1),C1),V1);	1	2	1	1
62	cl10602			-2		-2	((((G1,G2),(((G3,G4),M1),C1)),V1),V2);	1	4	1	2
63	cl10609						((((G1,G2),((G3,(G4,M1)),M2)),C1),V1);	1	4	2	1
64	cl10636	-3				-3	((V1,(((G1,G2),M1),C1)),V2);	1	2	1	2
65	cl10637	-2				-2	((((G1,(G2,G3)),M1),C1),V1);	1	3	1	1
66	cl10638	-3				-3	((((G1,G2),M1),C1),V1);	1	2	1	1
67	cl10642	-2				-2	(((((G1,G2),G3),M1),C1),V1);	1	3	1	1	G&M mis-ordered
68	cl10645	-2				-2	(((G1,((G2,G3),M1)),C1),V1);	1	3	1	1
69	cl10652	-3				-3	((((G1,G2),M1),C1),V1);	1	2	1	1
70	cl10658	-2				-2	((((M1,M2),(G1,G2)),C1),V1);	1	2	2	1
71	cl10665						((((M1,((((M2,((((M3,M4),M5),M6),M7)),G1),G2),C1)),(G3,(((C2,M8),(G4,G5)),(G6,G7)))),V1),V2);	2	7	8	2
72	cl10667	-3				-3	((((G1,G2),M1),C1),V1);	1	2	1	1
73	cl10681						((((G1,(G2,G3)),((G4,M1),M2)),C1),V1);	1	4	2	1
74	cl10683	-1				-1	(((((G1,G2),M1),((G3,(G4,G5)),G6)),C1),V1);	1	6	1	1	extra G
75	cl10701	-3				-3	((((G1,G2),M1),C1),V1);	1	2	1	1
76	cl10705	-1				-1	(((((G1,G2),((G3,G4),M1)),C1),V1),V2);	1	4	1	2
77	cl10710						((((G1,M1),C1),(G2,(G3,(G4,G5)))),V1);	1	5	1	1
78	cl10721	-3				-3	(((G1,(G2,M1)),C1),V1);	1	2	1	1
79	cl10723	-1				-1	(((((G1,G2),(G3,G4)),M1),C1),V1);	1	4	1	1	G&M mis-ordered
80	cl10727	-1				-1	(((V1,V2),(((G1,M1),((G2,G3),M2)),C1)),V3);	1	3	2	3	distorted and mis-rooted
81	cl10729	-1				-1	(((((G1,G2),M1),(G3,G4)),C1),V1);	1	4	1	1
82	cl10738			-2		-2	(((((G1,G2),M1),C1),(G3,G4)),V1);	1	4	1	1	mis-rooted
83	cl10740	-1				-1	(((M1,(G1,((G2,G3),G4))),C1),V1);	1	4	1	1	G&M mis-ordered
84	cl10741	-3				-3	((((G1,G2),M1),C1),V1);	1	2	1	1
85a	cl10745	-1				-1	((V1,(((((G1,G2),M1),(G3,(G4,G5))),C1),((G6,(((((G7,G8),(G9,G10)),C2),C3),V2)),V3))),V4);	3	10	1	4	extra G
86	cl10756	-1				-1	(((M1,((G1,G2),(G3,(G4,G5)))),C1),V1);	1	5	1	1	extra G; M misplaced
87	cl1076			-4		-4	((((G1,G2),C1),M1),V1);	1	2	1	1
88	cl10765						(((M1,C1),((G1,G2),G3)),V1);	1	3	1	1
89	cl10766	-1				-1	((((G1,G2),((G3,G4),M1)),C1),V1);	1	4	1	1
90	cl10778	-3				-3	((((G1,G2),M1),C1),V1);	1	2	1	1
91	cl1079	-2				-2	((((G1,(G2,G3)),M1),C1),V1);	1	3	1	1	extra G; M misplaced
92b	cl10808	-2				-2	((V1,((C1,((((G1,(G2,G3)),(((G4,G5),G6),G7)),(G8,G9)),M1)),((((G10,G11),(G12,G13)),C2),V2))),V3);	2	13	1	3
93	cl10818			-2		-2	((((G1,G2),(M1,M2)),((G3,G4),C1)),V1);	1	4	2	1
94	cl10819	-3				-3	((((G1,G2),M1),C1),V1);	1	2	1	1
95	cl10823						((V1,((((G1,G2),C1),V2),((G3,M1),(V3,V4)))),V5);	1	3	1	5
96	cl10826						((((G1,C1),C2),((G2,(G3,(M1,((M2,(((M3,M4),M5),M6)),((M7,M8),M9))))),(G4,G5))),V1);	2	5	9	1
97b	cl10837	0				0	(((((G1,G2),(V1,C1)),V2),(C2,(M1,(((G3,G4),M2),((G5,G6),G7))))),V3);	2	7	2	3	G&M mis-ordered
98	cl10842	-3				-3	(((((G1,G2),M1),C1),C2),V1);	2	2	1	1		C&C don't group together
99	cl10852	-3				-3	((V1,(G1,((V2,(V3,V4)),(((G2,G3),M1),C1)))),V5);	1	3	1	5
100	cl1087	-2				-2	(((((G1,G2),M1),G3),C1),V1);	1	3	1	1
101	cl10871	-1				-1	((((((G1,(G2,G3)),M1),((G4,G5),(G6,G7))),C1),V1),V2);	1	7	1	2	tandem dups retained in G
102	cl10875	-2				-2	(((((M1,M2),(G1,G2)),C1),((V1,V2),V3)),V4);	1	2	2	4
103	cl10883	-3				-3	((((G1,G2),M1),C1),V1);	1	2	1	1
104	cl10890	-2				-2	(((((G1,G2),G3),M1),C1),V1);	1	3	1	1	G&M mis-ordered
105	cl10898	-3				-3	(((((M1,M2),M3),(G1,(G2,G3))),C1),V1);	1	3	3	1	G&M mis-ordered
106	cl10899			-2		-2	((((M1,M2),(G1,G2)),((G3,G4),C1)),V1);	1	4	2	1	extra M
107	cl10901						((((G1,G2),M1),((V1,(V2,((((G3,G4),C1),C2),(G5,M2)))),V3)),V4);	2	5	2	4
108	cl10928	-3				-3	((((G1,G2),M1),C1),V1);	1	2	1	1
109	cl10938						(((G1,G2),(M1,((G3,G4),(((C1,((G5,(G6,G7)),M2)),(V1,V2)),V3)))),V4);	1	7	2	4
110	cl10948	-3				-3	((((G1,G2),M1),C1),V1);	1	2	1	1
111	cl10955	-3				-3	((((G1,G2),C1),M1),V1);	1	2	1	1
112a	cl10967		0			0	((((((((G1,G2),M1),(G3,(G4,M2))),(C1,C2)),V1),((((G5,G6),M3),(G7,G8)),C3)),(V2,(((G9,G10),M4),(G11,G12)))),V3);	2	4	2	1	M mis-placed
112c	cl10967	-1				-1	((((((((G1,G2),M1),(G3,(G4,M2))),(C1,C2)),V1),((((G5,G6),M3),(G7,G8)),C3)),(V2,(((G9,G10),M4),(G11,G12)))),V3);	1	4	1	1
113	cl10968	-3				-3	((((G1,G2),M1),C1),V1);	1	2	1	1
114	cl10969						(((C1,(((G1,G2),G3),((G4,G5),M1))),C2),V1);	2	5	1	1
115	cl10970	-3				-3	((((G1,G2),M1),C1),V1);	1	2	1	1
116	cl10981						((((G1,((M1,(((M2,M3),M4),M5)),G2)),(G3,M6)),C1),V1);	1	3	6	1
117	cl10992	-1				-1	(((((G1,G2),M1),(G3,G4)),C1),V1);	1	4	1	1
118	cl1100						((((((M1,M2),M3),M4),(G1,G2)),C1),V1);	1	2	4	1
119	cl1101	-3				-3	(((((G1,G2),M1),C1),V1),V2);	1	2	1	2
120	cl11018	-3				-3	((V1,(((G1,G2),M1),C1)),V2);	1	2	1	2
121	cl11032	-3				-3	((((G1,G2),M1),C1),V1);	1	2	1	1
122	cl1106						(((M1,(G1,((G2,(G3,G4)),G5))),(C1,M2)),V1);	1	5	2	1
123	cl11070						((((G1,G2),(G3,G4)),(((G5,M1),C1),C2)),V1);	2	5	1	1
124	cl11073						(((((G1,(G2,(G3,G4))),(G5,(G6,G7))),M1),C1),V1);	1	7	1	1
125	cl11105						(((((G1,G2),M1),C1),(((G3,G4),V1),(V2,((G5,G6),C2)))),V3);	2	6	1	3
126	cl11109	-2				-2	((C1,(G1,((G2,G3),M1))),V1);	1	3	1	1
127	cl11113	0				0	(((((G1,G2),M1),((G3,G4),M2)),C1),V1);	1	4	2	1
128	cl11119	-3				-3	((((G1,G2),M1),C1),V1);	1	2	1	1
129	cl11131	-3				-3	((V1,(((G1,G2),M1),C1)),V2);	1	2	1	2
130	cl11142			-4		-4	(((G1,G2),(M1,C1)),V1);	1	2	1	1
131	cl11162	-3				-3	(((((G1,G2),M1),C1),(V1,V2)),V3);	1	2	1	3
132	cl11164	-3				-3	(((((G1,G2),M1),C1),M2),V1);	1	2	2	1
133	cl11166	-3				-3	((((G1,G2),M1),C1),V1);	1	2	1	1
134	cl11169	-3				-3	((((G1,G2),M1),C1),V1);	1	2	1	1
135	cl11170						((((((V1,C1),((G1,G2),M1)),C2),V2),((G3,G4),C3)),V3);	3	4	1	3
136	cl11173			-2		-2	(((G1,G2),(((G3,G4),M1),C1)),V1);	1	4	1	1
137	cl11176	-3				-3	((((G1,G2),M1),C1),V1);	1	2	1	1
138a	cl11181	0				0	(((((G1,G2),(G3,M1)),(V1,((((G4,G5),M2),((G6,G7),M3)),C1))),V2),V3);	1	7	3	3		clean, but with extra outgroup clade
139	cl11208	-3				-3	((((G1,G2),M1),C1),V1);	1	2	1	1
140	cl11222	-1				-1	((((G1,G2),(M1,(G3,(G4,(G5,G6))))),C1),V1);	1	6	1	1	extra G
141	cl11230	-1				-1	((V1,((((G1,G2),M1),(G3,G4)),C1)),V2);	1	4	1	2
142	cl11233	-2				-2	(((((G1,G2),M1),M2),C1),V1);	1	2	2	1
143	cl11237						((C1,(((((G1,G2),M1),C2),V1),(G3,G4))),V2);	2	4	1	2
144	cl1124						((C1,(((G1,C2),(C3,(((G2,G3),G4),(V1,(((M1,M2),M3),(G5,G6)))))),G7)),V2);	3	7	3	2
145	cl11240	-3				-3	((((G1,G2),M1),C1),V1);	1	2	1	1
146	cl11251	-3				-3	((((G1,G2),M1),C1),V1);	1	2	1	1
147	cl11262						(((V1,V2),((((G1,G2),G3),((C1,C2),((((V3,(G4,C3)),M1),G5),(((M2,M3),(G6,G7)),C4)))),(V4,(((V5,V6),(((G8,M4),(C5,(((G9,G10),((G11,G12),G13)),M5))),(C6,(((G14,G15),((G16,G17),M6)),((((M7,M8),G18),(G19,((G20,G21),G22))),(((G23,M9),M10),C7)))))),(V7,(V8,((V9,	7	23	10	12	lots of tandem duplication
148	cl11263	-3				-3	((((G1,G2),M1),C1),V1);	1	2	1	1
149	cl11264	-3				-3	((((G1,G2),M1),C1),V1);	1	2	1	1
150	cl11265	-1				-1	((((((G1,G2),M1),(G3,G4)),C1),V1),V2);	1	4	1	2	mis-rooted
151	cl11282	-3				-3	((((G1,G2),M1),C1),V1);	1	2	1	1
152	cl11284	-2				-2	((V1,(((((G1,G2),M1),M2),C1),V2)),V3);	1	2	2	3
153	cl113	-3				-3	((((G1,G2),M1),C1),V1);	1	2	1	1
154	cl11303						(((((G1,G2),((G3,M1),G4)),C1),(((V1,(((V2,(V3,(((G5,G6),(G7,M2)),(C2,C3)))),(((G8,G9),G10),C4)),((G11,G12),(((M3,M4),V4),((V5,((V6,((G13,G14),C5)),((G15,G16),C6))),C7))))),C8),C9)),V7);	9	16	4	7	complex
155	cl11339	-3				-3	((V1,(((G1,G2),M1),C1)),V2);	1	2	1	2
156	cl11344	-3				-3	((((G1,G2),M1),C1),V1);	1	2	1	1
157	cl11351	-3				-3	(((((G1,G2),M1),C1),C2),V1);	2	2	1	1
158	cl11362						(((M1,C1),(G1,G2)),V1);	1	2	1	1
159	cl11383	-3				-3	((((G1,G2),M1),C1),V1);	1	2	1	1
160	cl1139	-3				-3	((V1,(((G1,G2),M1),C1)),V2);	1	2	1	2
161a	cl11403			-2		-2	(((((G1,G2),M1),((G3,G4),C1)),((((G5,G6),M2),((M3,M4),M5)),(G7,G8))),V1);	1	4	1	1
162	cl11421						((((G1,G2),C1),M1),V1);	1	2	1	1
163	cl11450						((((G1,G2),(M1,M2)),C1),V1);	1	2	2	1
164	cl11451	-3				-3	((((G1,G2),M1),C1),V1);	1	2	1	1
165a	cl11484			-2		-2	((((((G1,G2),M1),C1),(G3,G4)),((((G5,G6),C2),(V1,V2)),(C3,(G7,((G8,G9),M2))))),V3);	1	4	1	1
165b	cl11484	-2				-2	((((((G1,G2),M1),C1),(G3,G4)),((((G5,G6),C2),(V1,V2)),(C3,(G7,((G8,G9),M2))))),V3);	1	3	1	2
166	cl11495	-1				-1	(((((G1,G2),M1),(G3,G4)),C1),V1);	1	4	1	1
167	cl11498	-3				-3	((((G1,G2),M1),C1),V1);	1	2	1	1
168	cl1150						(((((G1,G2),M1),G3),(V1,(((G4,M2),C1),G5))),V2);	1	5	2	2
169a	cl11516	-2				-2	((((((M1,M2),(G1,G2)),C1),(V1,V2)),((G3,G4),C2)),V3);	1	2	2	2
170	cl11538						((((G1,G2),M1),(((V1,C1),C2),(G3,M2))),V2);	2	3	2	2
171	cl11541	-3				-3	((((G1,G2),M1),C1),V1);	1	2	1	1
172	cl11546			-4		-4	(((M1,C1),(G1,G2)),V1);	1	2	1	1
173	cl1155						(((G1,G2),((G3,G4),(M1,C1))),V1);	1	4	1	1
174b	cl11562	-2				-2	(((V1,V2),((((((C1,C2),(M1,M2)),C3),(G1,(G2,G3))),((G4,G5),((((((G6,G7),(G8,G9)),C4),V3),V4),(G10,G11)))),G12)),V5);	1	4	0	2
175	cl11570	-3				-3	((((G1,G2),M1),C1),V1);	1	2	1	1
176	cl11574						(((G1,M1),(C1,((((G2,G3),M2),M3),G4))),V1);	1	4	3	1
177	cl11577	-3				-3	((((G1,G2),M1),C1),V1);	1	2	1	1
178	cl11589	-2				-2	((V1,(C1,((G1,(G2,G3)),M1))),V2);	1	3	1	2
179a	cl11597	-3				-3	(((V1,((G1,G2),C1)),(((G3,G4),M1),C2)),V2);	1	2	1	1
180	cl11603						(((M1,C1),((G1,((G2,G3),((G4,G5),G6))),G7)),V1);	1	7	1	1
181	cl11616	-3				-3	((((G1,G2),M1),C1),V1);	1	2	1	1
182	cl11617						((G1,(G2,(M1,C1))),V1);	1	2	1	1
183	cl11629						((V1,(((((G1,G2),G3),(((M1,M2),M3),G4)),C1),C2)),V2);	2	4	3	2
184	cl11642	-3				-3	((((G1,G2),M1),C1),V1);	1	2	1	1
185	cl11644	-2				-2	((((G1,(G2,G3)),M1),C1),V1);	1	3	1	1	G&M mis-ordered
186	cl11655						((((G1,((V1,((((G2,M1),(G3,(G4,G5))),C1),V2)),G6)),M2),(C2,C3)),V3);	3	6	2	3
187	cl11658						((C1,(((G1,G2),(M1,M2)),(G3,G4))),V1);	1	4	2	1
188	cl11662						(((G1,G2),(M1,C1)),V1);	1	2	1	1
189	cl1167						((C1,(((G1,G2),M1),C2)),V1);	2	2	1	1
190a	cl11681	-1				-1	(((((C1,C2),((G1,G2),M1)),(V1,(C3,(((G3,G4),(G5,G6)),M2)))),((((G7,G8),M3),C4),V2)),V3);	1	4	1	1
190b	cl11681		-3			-3	(((((C1,C2),((G1,G2),M1)),(V1,(C3,(((G3,G4),(G5,G6)),M2)))),((((G7,G8),M3),C4),V2)),V3);	2	2	1	1
190c	cl11681	-3				-3	(((((C1,C2),((G1,G2),M1)),(V1,(C3,(((G3,G4),(G5,G6)),M2)))),((((G7,G8),M3),C4),V2)),V3);	1	2	1	1
191	cl11688	-3				-3	((((G1,G2),M1),C1),V1);	1	2	1	1
192	cl11689	-3				-3	((((G1,G2),M1),C1),V1);	1	2	1	1
193	cl11694	-2				-2	((C1,(((M1,M2),M3),((G1,G2),G3))),V1);	1	3	3	1	tandem dups in G and M
194	cl11696	-3				-3	((((G1,G2),M1),C1),V1);	1	2	1	1
195	cl11704	-3				-3	((((G1,G2),M1),C1),V1);	1	2	1	1
196	cl11709			-2		-2	(((G1,G2),(((G3,G4),M1),C1)),V1);	1	4	1	1
197	cl1171						(((((M1,M2),M3),((G1,M4),G2)),C1),V1);	1	2	4	1
198	cl11710						(((((G1,(G2,(G3,G4))),G5),M1),C1),V1);	1	5	1	1
199	cl11717						((M1,(G1,(G2,((((G3,G4),M2),C1),(G5,G6))))),V1);	1	6	2	1
200	cl11720	-1				-1	((((G1,((G2,G3),G4)),M1),C1),V1);	1	4	1	1	G&M mis-ordered
201	cl1174	-3				-3	((((G1,G2),M1),C1),V1);	1	2	1	1
202	cl11750	-2				-2	((V1,(C1,(G1,((G2,G3),M1)))),V2);	1	3	1	2
203	cl11763	-3				-3	(((G1,(G2,M1)),C1),V1);	1	2	1	1
204	cl11764	0				0	(((((G1,(G2,M1)),M2),(G3,G4)),C1),V1);	1	4	2	1	G&M mis-ordered
205	cl1177	-3				-3	((((G1,G2),M1),C1),V1);	1	2	1	1
206	cl11774	-3				-3	((((G1,G2),M1),C1),V1);	1	2	1	1
207	cl11785			-4		-4	((((G1,G2),C1),M1),V1);	1	2	1	1
208	cl11790	-3				-3	((((G1,G2),M1),C1),V1);	1	2	1	1
209	cl11798						((((G1,G2),C1),M1),V1);	1	2	1	1
210	cl11811	-3				-3	((((G1,G2),M1),C1),V1);	1	2	1	1
211	cl11816	-2				-2	((((G1,G2),(G3,M1)),C1),V1);	1	3	1	1
212	cl1189	-3				-3	(((((M1,M2),M3),(G1,G2)),C1),V1);	1	2	3	1	extra M
213	cl119	-3				-3	((((G1,G2),M1),C1),V1);	1	2	1	1
214	cl1200						((G1,(((G2,G3),(M1,C1)),M2)),V1);	1	3	2	1
215	cl1207	-3				-3	((V1,((((M1,M2),M3),(G1,G2)),C1)),V2);	1	2	3	2	extra M
216	cl1209	-3				-3	((V1,(((G1,G2),M1),C1)),V2);	1	2	1	2
217	cl121						((V1,((G1,C1),((G2,C2),(G3,(C3,M1))))),V2);	3	3	1	2
218	cl1214	-3				-3	((((G1,G2),M1),C1),V1);	1	2	1	1
219	cl1231						((V1,(((G1,G2),C1),M1)),V2);	1	2	1	2
220	cl124						(((G1,(G2,G3)),(((G4,G5),M1),C1)),V1);	1	5	1	1
221	cl1244	-3				-3	((((G1,G2),(M1,M2)),C1),V1);	1	2	2	1	extra M
222	cl1252						(((((G1,G2),G3),((C1,C2),G4)),M1),V1);	2	4	1	1
223	cl1255						((((G1,C1),G2),M1),V1);	1	2	1	1
224	cl1266	-3				-3	((V1,(((G1,G2),M1),C1)),V2);	1	2	1	2
225	cl1277						((((V1,(G1,G2)),C1),(V2,(G3,((G4,G5),M1)))),V3);	1	5	1	3
226	cl1300	-3				-3	((((G1,G2),M1),C1),V1);	1	2	1	1
227	cl1307	0				0	(((((G1,G2),M1),(((G3,G4),G5),M2)),C1),V1);	1	5	2	1	extra G
228	cl1308	-3				-3	(((((G1,G2),M1),C1),C2),V1);	2	2	1	1		C&C don't group together
229	cl1310	-3				-3	((((G1,G2),M1),C1),V1);	1	2	1	1
230	cl1317	-2				-2	(((((G1,G2),(G3,G4)),(G5,M1)),C1),V1);	1	5	1	1	G&M mis-ordered
231	cl133	-1				-1	(((((G1,G2),G3),(G4,M1)),C1),V1);	1	4	1	1	G&M mis-ordered
232	cl1343						(((G1,(G2,((G3,(C1,(((G4,G5),M1),M2))),G6))),M3),V1);	1	6	3	1
233	cl1348						((V1,((((G1,G2),(M1,M2)),C1),((G3,(G4,G5)),(G6,G7)))),V2);	1	7	2	2
234	cl1350						((G1,(((V1,C1),M1),G2)),V2);	1	2	1	2
235	cl1353	-3				-3	((((G1,G2),M1),C1),V1);	1	2	1	1
236	cl136	-3				-3	(((((G1,G2),M1),C1),V1),V2);	1	2	1	2
237	cl1365						((((((((G1,C1),C2),((G2,M1),C3)),C4),C5),(C6,M2)),C7),V1);	7	2	2	1
238	cl1375	-3				-3	((((G1,G2),M1),C1),V1);	1	2	1	1
239	cl1384	-3				-3	((((G1,G2),M1),C1),V1);	1	2	1	1
240	cl139	-3				-3	((((G1,G2),M1),C1),V1);	1	2	1	1
241	cl1391	-3				-3	((((G1,G2),((M1,M2),M3)),C1),V1);	1	2	3	1	extra M
242	cl1401	-3				-3	((((G1,G2),M1),C1),V1);	1	2	1	1
243	cl1402						(((((M1,C1),(G1,G2)),(G3,G4)),(G5,(G6,(G7,(V1,G8))))),V2);	1	8	1	2
244	cl1404	-3				-3	((((G1,G2),M1),C1),V1);	1	2	1	1
245	cl1416	-3				-3	((V1,(((G1,G2),M1),C1)),V2);	1	2	1	2
246	cl1419						((((((G1,M1),M2),G2),M3),C1),V1);	1	2	3	1
247	cl1437	-2				-2	(((G1,((G2,G3),M1)),C1),V1);	1	3	1	1
248	cl1444						((G1,(M1,(G2,(((V1,C1),(G3,G4)),M2)))),V2);	1	4	2	2
249	cl1452						(((G1,(G2,C1)),M1),V1);	1	2	1	1
250	cl1454						((V1,((((G1,G2),M1),(V2,V3)),((G3,M2),C1))),V4);	1	3	2	4
251a	cl1459						(((((G1,G2),M1),C1),((M2,C2),(C3,M3))),V1);	3	2	3	1
252	cl1477	-3				-3	((((G1,G2),M1),C1),V1);	1	2	1	1
253	cl1482	-3				-3	((((G1,G2),M1),C1),V1);	1	2	1	1
254	cl1522						(((((G1,C1),G2),C2),(V1,M1)),V2);	2	2	1	2
255	cl1526	-3				-3	((((G1,G2),(M1,M2)),C1),V1);	1	2	2	1	extra M
256	cl1532	-1				-1	(((((G1,G2),(G3,G4)),M1),C1),V1);	1	4	1	1	G&M mis-ordered
257	cl1534						(((((G1,G2),M1),C1),C2),V1);	2	2	1	1
258	cl1535						(((G1,(G2,M1)),C1),V1);	1	2	1	1
259a	cl1537	-2				-2	((((G1,((M1,M2),G2)),C1),((G3,G4),V1)),V2);	1	2	2	1	G&M mis-ordered
260	cl1553						((((((((G1,M1),C1),G2),(G3,G4)),(G5,M2)),(((G6,G7),C2),C3)),V1),V2);	3	7	2	2
261	cl1564	-2				-2	((((G1,(G2,M1)),M2),C1),V1);	1	2	2	1	G&M mis-ordered
262	cl1578						(((((((((G1,G2),G3),((G4,G5),G6)),G7),(M1,M2)),(C1,C2)),V1),V2),V3);	2	7	2	3
263	cl1587						((((G1,M1),G2),C1),V1);	1	2	1	1
264	cl1598	-3				-3	((((G1,G2),M1),C1),V1);	1	2	1	1
265	cl1642						((M1,(M2,((G1,(((G2,G3),G4),G5)),C1))),V1);	1	5	2	1
266	cl1652	-1				-1	(((((((G1,G2),M1),(G3,G4)),C1),V1),C2),V2);	2	4	1	2
267	cl166						(((((G1,G2),M1),C1),M2),V1);	1	2	2	1
268	cl1675	-3				-3	((((G1,G2),M1),C1),V1);	1	2	1	1
269	cl1681	-3				-3	((V1,(((G1,G2),M1),C1)),V2);	1	2	1	2
270	cl1702			-3		-3	((((G1,G2),((G3,M1),C1)),V1),V2);	1	3	1	2
271	cl1720						((G1,(((M1,C1),M2),(G2,(G3,G4)))),V1);	1	4	2	1
272a	cl1723	-2				-2	(((((G1,G2),M1),C1),(((G3,G4),(G5,G6)),C2)),V1);	1	4	0	0
272b	cl1723	-3				-3	(((((G1,G2),M1),C1),(((G3,G4),(G5,G6)),C2)),V1);	1	2	1	1
273	cl1734	-3				-3	((V1,(((G1,G2),M1),C1)),V2);	1	2	1	2
274	cl1735	-1				-1	((((G1,G2),((G3,G4),M1)),C1),V1);	1	4	1	1	clean
275	cl1742	-3				-3	((((G1,G2),M1),C1),V1);	1	2	1	1
276	cl1750	-2				-2	((((((M1,M2),G1),(G2,G3)),C1),V1),V2);	1	3	2	2
277	cl1762						((G1,(G2,(C1,M1))),V1);	1	2	1	1
278	cl1763						(((G1,M1),((G2,C1),V1)),V2);	1	2	1	2
279	cl1771	-1				-1	(((((((G1,G2),(G3,G4)),M1),C1),V1),V2),V3);	1	4	1	3	G&M mis-ordered
280a	cl178			-2		-2	(((((G1,G2),M1),C1),(G3,G4)),V1);	1	4	1	1
281	cl1785	-1				-1	((((C1,(((G1,G2),(G3,G4)),((G5,G6),M1))),(V1,((G7,G8),C2))),V2),V3);	1	6	1	2	extra G
282	cl1792						(((((G1,G2),C1),C2),M1),V1);	2	2	1	1
283	cl1803						((((G1,(G2,G3)),M1),(G4,C1)),V1);	1	4	1	1
284	cl1819						(((G1,(G2,G3)),((C1,M1),(G4,(G5,G6)))),V1);	1	6	1	1
285	cl1821	-3				-3	((((G1,G2),M1),C1),V1);	1	2	1	1
286	cl1838	-1				-1	((((((((G1,G2),((G3,G4),(G5,G6))),(((G7,G8),M1),(G9,G10))),C1),V1),V2),V3),V4);	1	10	1	4	several retained dups in G
287	cl1860	-3				-3	((((G1,G2),M1),C1),V1);	1	2	1	1
288	cl1870						((((G1,(((G2,(G3,G4)),G5),(G6,G7))),M1),C1),V1);	1	7	1	1
289	cl1882			-4		-4	(((((G1,G2),C1),(M1,M2)),V1),V2);	1	2	2	2	mis-ordered
290	cl1884	-2				-2	((C1,((G1,(G2,G3)),M1)),V1);	1	3	1	1
291	cl1885	-3				-3	((((G1,G2),M1),C1),V1);	1	2	1	1
292a	cl1894	-2				-2	((((C1,((G1,(G2,M1)),M2)),V1),M3),V2);	1	2	2	1
293	cl1897						(((M1,C1),(G1,G2)),V1);	1	2	1	1
294	cl1901	-3				-3	((((G1,G2),M1),C1),V1);	1	2	1	1
295	cl1907						(((V1,C1),(((G1,M1),C2),((((G2,G3),G4),C3),V2))),V3);	3	4	1	3
296	cl1912						(((V1,(G1,G2)),(((((G3,C1),(M1,C2)),(((C3,M2),(G4,C4)),C5)),V2),C6)),V3);	6	4	2	3
297	cl1924	-3				-3	((((G1,G2),M1),C1),V1);	1	2	1	1
298a	cl1931	-3				-3	((((G1,G2),C1),(V1,(((G3,G4),M1),C2))),V2);	2	4	1	2
299	cl1955	-3				-3	((((G1,G2),M1),C1),V1);	1	2	1	1
300	cl1959	-1				-1	((((G1,(G2,M1)),(G3,G4)),C1),V1);	1	4	1	1	G&M mis-ordered
301	cl1987	-1				-1	(((((G1,G2),M1),(G3,G4)),C1),V1);	1	4	1	1
302	cl199	-3				-3	((((G1,G2),M1),C1),V1);	1	2	1	1
303	cl1990				-5	-5	((((M1,M2),((C1,C2),(G1,G2))),V1),V2);	2	2	2	2
304	cl2	-3				-3	(((((G1,G2),M1),C1),V1),V2);	1	2	1	2
305	cl20	-3				-3	(((((G1,G2),M1),C1),C2),V1);	2	2	1	1		C&C don't group together
306	cl2011	-2				-2	((((((G1,G2),G3),M1),C1),V1),V2);	1	3	1	2
307	cl2015	-1				-1	((((G1,G2),((G3,G4),M1)),C1),V1);	1	4	1	1	clean
308	cl2027	-3				-3	((((M1,M2),(G1,G2)),C1),V1);	1	2	2	1
309a	cl2028	-1				-1	(((V1,((G1,(G2,G3)),(((M1,M2),(G4,M3)),(V2,((V3,(G5,G6)),((((G7,G8),(G9,G10)),M4),C1)))))),V4),V5);	1	4	1	1
310	cl203	-3				-3	((((G1,G2),(M1,M2)),C1),V1);	1	2	2	1	extra M
311b	cl2030	-3				-3	(((((G1,G2),C1),(C2,(C3,(V1,((G3,G4),((M1,M2),M3)))))),((((G5,G6),M4),C4),V2)),V3);	4	6	4	3	messy
312	cl2044						((((G1,M1),C1),G2),V1);	1	2	1	1
313	cl2052			-1		-1	(((G1,G2),(((((G3,G4),M1),C1),((G5,G6),M2)),C2)),V1);	1	6	2	1		ambiguous: one Cf groups with MGG and one is outside; could be H1b or H2a
314	cl2057	-3				-3	((((G1,G2),M1),C1),V1);	1	2	1	1
315	cl2061	-3				-3	((((G1,G2),M1),C1),V1);	1	2	1	1
316	cl207						((((((G1,M1),(G2,(G3,G4))),((M2,M3),M4)),C1),V1),V2);	1	4	4	2
317	cl2079	-1				-1	((V1,(((G1,G2),((G3,G4),M1)),C1)),V2);	1	4	1	2
318	cl2092	-3				-3	(((G1,(G2,M1)),C1),V1);	1	2	1	1
319	cl2100						((((((((((G1,G2),M1),C1),M2),(G3,G4)),V1),(G5,G6)),(V2,(V3,V4))),G7),V5);	1	7	2	5
320	cl2105	-2				-2	((((((G1,G2),(M1,M2)),G3),C1),V1),V2);	1	3	2	2
321	cl2116	-3				-3	((((G1,G2),M1),C1),V1);	1	2	1	1
322	cl2127	-1				-1	(((((G1,G2),M1),(G3,G4)),C1),V1);	1	4	1	1
323	cl2135	-3				-3	((((G1,G2),M1),C1),V1);	1	2	1	1
324	cl2140						(((((G1,G2),M1),C1),(((G3,C2),G4),(G5,M2))),V1);	2	5	2	1
325	cl2156	-3				-3	((((G1,G2),M1),C1),V1);	1	2	1	1
326	cl2162	-3				-3	((((G1,G2),M1),C1),V1);	1	2	1	1
327	cl217	-3				-3	((((G1,G2),M1),C1),V1);	1	2	1	1
328	cl2171	-3				-3	((((G1,G2),M1),C1),V1);	1	2	1	1
329	cl2175	-3				-3	((((G1,G2),M1),C1),V1);	1	2	1	1
330b	cl2177			-4		-4	(((((G1,G2),C1),M1),((G3,(M2,C2)),V1)),V2);	2	3	2	2
331	cl2183						((((G1,C1),G2),((G3,G4),M1)),V1);	1	4	1	1
332	cl2195			-4		-4	((((M1,M2),C1),(G1,G2)),V1);	1	2	2	1
333	cl221						(((G1,C1),((M1,M2),(G2,G3))),V1);	1	3	2	1
334	cl2213	-3				-3	((((G1,G2),M1),C1),V1);	1	2	1	1
335	cl2228						((M1,((((M2,M3),(M4,M5)),(G1,G2)),C1)),V1);	1	2	5	1
336	cl223	-3				-3	((((G1,G2),M1),C1),V1);	1	2	1	1
337b	cl2233	-1				-1	(((V1,(G1,(G2,(G3,G4)))),((((G5,G6),((G7,(G8,G9)),M1)),C1),V2)),V3);	1	9	1	3	extra G
338	cl226	-3				-3	((((G1,G2),M1),C1),V1);	1	2	1	1
339	cl2274	-3				-3	((((G1,G2),M1),C1),V1);	1	2	1	1
340	cl2284	-3				-3	((((G1,G2),M1),C1),V1);	1	2	1	1
341	cl2285	-3				-3	((((G1,G2),M1),C1),V1);	1	2	1	1
342	cl229	-3				-3	((((G1,G2),M1),C1),V1);	1	2	1	1
343	cl2298						((((G1,((M1,M2),M3)),((G2,G3),(G4,G5))),C1),V1);	1	5	3	1
344	cl2306						(((V1,((G1,G2),G3)),(((G4,G5),M1),C1)),V2);	1	5	1	2
345	cl2312	-3				-3	(((((G1,G2),M1),C1),C2),V1);	2	2	1	1
346	cl2314	-1				-1	((((G1,G2),((M1,M2),(G3,G4))),C1),V1);	1	4	2	1	extra M
347	cl2315			-4		-4	((((G1,M1),C1),G2),V1);	1	2	1	1
348b	cl2317	-1				-1	(((G1,((C1,M1),G2)),((V1,((G3,(G4,G5)),C2)),(V2,((C3,((((G6,G7),M2),M3),(G8,G9))),C4)))),V3);	4	9	3	3	G&M mis-ordered	C&C don't group together
349	cl2338	-3				-3	((((G1,G2),M1),C1),V1);	1	2	1	1
350	cl2341	-1				-1	(((((G1,G2),M1),(G3,G4)),C1),V1);	1	4	1	1
351	cl2345	-3				-3	((((G1,G2),M1),C1),V1);	1	2	1	1
352a	cl2349			-2		-2	((((((G1,G2),M1),C1),(G3,G4)),(((M2,C2),G5),V1)),V2);	2	5	2	2
353	cl2376	-3				-3	((((M1,M2),(G1,G2)),C1),V1);	1	2	2	1
354	cl2390						(((M1,(((V1,G1),C1),G2)),V2),V3);	1	2	1	3
355	cl2392			-3		-3	(((G1,(G2,M1)),((G3,G4),C1)),V1);	1	4	1	1
356	cl2400	-3				-3	((((G1,G2),M1),C1),V1);	1	2	1	1
357a	cl2412	-2				-2	((M1,((((G1,G2),(G3,G4)),C1),V1)),V2);	1	4	1	2
358	cl2431						((M1,(G1,((G2,C1),M2))),V1);	1	2	2	1
359	cl2458			-1		-1	((V1,((((G1,G2),M1),C1),((G3,(G4,G5)),M2))),V2);	1	5	2	2	extra G
360	cl2462						((G1,(((G2,C1),(G3,((V1,(G4,G5)),G6))),((G7,(G8,((V2,M1),G9))),G10))),V3);	1	10	1	3
361	cl2474	-3				-3	((((M1,M2),(G1,G2)),C1),V1);	1	2	2	1
362	cl2485	-3				-3	((((G1,G2),M1),C1),V1);	1	2	1	1
363	cl2488	-3				-3	((((G1,G2),M1),C1),V1);	1	2	1	1
364	cl2491			-4		-4	(((M1,C1),(G1,G2)),V1);	1	2	1	1
365	cl2500	-2				-2	((((G1,M1),(G2,G3)),C1),V1);	1	3	1	1
366	cl2507						((((G1,G2),(C1,C2)),M1),V1);	2	2	1	1
367	cl2508	-3				-3	((((G1,G2),M1),C1),V1);	1	2	1	1
368	cl2511						(((G1,G2),((((V1,((G3,((V2,(C1,((((G4,(((M1,M2),M3),M4)),G5),((G6,G7),G8)),M5))),V3)),C2)),C3),M6),((G9,G10),M7))),V4);	3	10	7	4
369	cl2514	-3				-3	(((((G1,G2),M1),C1),V1),V2);	1	2	1	2
370	cl2519						(((G1,G2),(((G3,G4),C1),M1)),V1);	1	4	1	1
371	cl254						(((((G1,((G2,G3),G4)),((V1,V2),(((G5,G6),M1),C1))),V3),V4),V5);	1	6	1	5
372b	cl2543	0				0	((((((G1,G2),M1),((G3,G4),M2)),C1),(M3,((G5,G6),(((G7,G8),G9),M4)))),V1);	1	4	2	1	clean
373	cl2547			-4		-4	((((G1,G2),C1),M1),V1);	1	2	1	1
374	cl2552						((G1,((((((G2,G3),C1),M1),M2),(G4,G5)),V1)),V2);	1	5	2	2
375	cl2558	-3				-3	((((G1,G2),M1),C1),V1);	1	2	1	1
376	cl2565	-3				-3	((((G1,G2),M1),C1),V1);	1	2	1	1
377	cl2568	-1				-1	((((G1,(G2,G3)),((G4,M1),M2)),C1),V1);	1	4	2	1	extra M
378	cl2574			-4		-4	((((M1,C1),(G1,G2)),V1),V2);	1	2	1	2
379	cl2579	-1				-1	((((G1,(G2,G3)),(G4,M1)),C1),V1);	1	4	1	1	G&M mis-ordered
380	cl2581	-3				-3	((((G1,G2),M1),C1),V1);	1	2	1	1
381	cl2587	-3				-3	((((G1,G2),M1),C1),V1);	1	2	1	1
382	cl2600	-3				-3	((((G1,G2),M1),C1),V1);	1	2	1	1
383	cl2614						(((((((G1,(G2,C1)),V1),(G3,(G4,((C2,(G5,(((G6,G7),C3),V2))),G8)))),(G9,(G10,M1))),C4),G11),V3);	4	11	1	3
384	cl263						((((((G1,G2),M1),(C1,C2)),M2),(((G3,G4),C3),M3)),V1);	3	4	3	1	C duplicate
385	cl2631	-3				-3	((((G1,G2),M1),C1),V1);	1	2	1	1
386	cl2643						(((((G1,G2),M1),C1),(M2,C2)),V1);	2	2	2	1
387	cl2644	-3				-3	((((G1,G2),M1),C1),V1);	1	2	1	1
388	cl2657	-3				-3	(((((G1,G2),M1),C1),V1),V2);	1	2	1	2
389	cl268			0		0	(((((M1,M2),(G1,G2)),C1),(((G3,G4),M3),C2)),V1);	2	4	3	1	perfect H2a
390	cl2687						((M1,(((G1,G2),C1),V1)),V2);	1	2	1	2
391	cl2691			-3		-3	(((G1,G2),(((G3,G4),C1),M1)),V1);	1	4	1	1
392	cl2694	-2				-2	((V1,(C1,(((G1,G2),M1),G3))),V2);	1	3	1	2
393	cl2695		-3			-3	((((G1,G2),M1),(C1,C2)),V1);	2	2	1	1
394	cl270	-3				-3	((((G1,G2),M1),C1),V1);	1	2	1	1
395	cl2701			0		0	((((((G1,G2),M1),C1),(((G3,G4),M2),C2)),V1),V2);	2	4	2	2	perfect H2a
396	cl2708	-2				-2	(((G1,((G2,M1),M2)),C1),V1);	1	2	2	1
397	cl2710						((V1,((V2,(V3,(V4,V5))),((G1,G2),((M1,C1),G3)))),V6);	1	3	1	6
398	cl2715	-1				-1	((((G1,G2),((G3,G4),M1)),C1),V1);	1	4	1	1
399	cl2719	-3				-3	((((G1,G2),M1),C1),V1);	1	2	1	1
400	cl2725						(((((((G1,G2),G3),M1),C1),C2),C3),V1);	3	3	1	1
401	cl2727	-3				-3	((((G1,G2),M1),C1),V1);	1	2	1	1
402	cl2738						((((G1,C1),M1),C2),V1);	2	1	1	1
403a	cl2741	-3				-3	(((V1,(M1,C1)),((G1,C2),((G2,M2),M3))),V2);	2	2	3	2
404	cl2756						((((G1,G2),V1),((((G3,G4),M1),C1),V2)),V3);	1	4	1	3
405	cl2757			-3		-3	((G1,(((G2,G3),M1),C1)),V1);	1	3	1	1
406	cl2758			-3		-3	((((G1,G2),C1),M1),V1);	1	2	1	1
407	cl2779	-2				-2	(((G1,((G2,G3),M1)),C1),V1);	1	3	1	1
408	cl2783	-3				-3	((((G1,G2),M1),C1),V1);	1	2	1	1
409	cl279	-3				-3	((((G1,G2),M1),C1),V1);	1	2	1	1
410	cl2795						((G1,((((G2,G3),((G4,G5),G6)),(((M1,M2),C1),C2)),C3)),V1);	3	6	2	1
411	cl2818						(((G1,(((M1,M2),M3),G2)),C1),V1);	1	2	3	1
412	cl2820						((V1,(((G1,(C1,C2)),M1),(G2,G3))),V2);	2	3	1	2
413	cl2825	0				0	((((G1,G2),(((G3,G4),M1),M2)),C1),V1);	1	4	2	1	G&M mis-ordered
414	cl2833			-1		-1	(((G1,(G2,M1)),(((G3,G4),M2),C1)),V1);	1	4	2	1
415	cl284						(((((G1,G2),C1),M1),((((G3,G4),C2),V1),(V2,((G5,G6),C3)))),V3);	3	6	1	3
416	cl2850						((V1,((((G1,G2),(G3,G4)),(M1,C1)),G5)),V2);	1	5	1	2
417	cl2855						((M1,(((G1,G2),C1),(((G3,G4),C2),G5))),V1);	2	5	1	1
418	cl2864	0				0	(((((M1,M2),((G1,G2),(G3,G4))),C1),V1),V2);	1	4	2	2	G&M mis-ordered
419	cl2866						(((G1,(G2,M1)),(((((M2,M3),C1),M4),G3),V1)),V2);	1	3	4	2
420	cl288	-1				-1	((((G1,G2),((G3,(G4,G5)),(M1,M2))),C1),V1);	1	5	2	1	G&M mis-ordered
421	cl2889						((((M1,((G1,G2),(((G3,G4),V1),C1))),(G5,(M2,M3))),V2),V3);	1	5	3	3
422	cl2896						((((((G1,G2),C1),C2),(((M1,M2),M3),V1)),((G3,((G4,G5),C3)),M4)),V2);	3	5	4	2
423	cl2902	-1				-1	(((M1,(G1,(G2,(G3,G4)))),C1),V1);	1	4	1	1	G&M mis-ordered
424	cl2907						(((M1,(M2,((M3,(G1,(G2,(G3,G4)))),M4))),C1),V1);	1	4	4	1
425	cl2918	-1				-1	((V1,(((G1,G2),((G3,G4),M1)),C1)),V2);	1	4	1	2
426	cl2922						(((((G1,((M1,C1),M2)),G2),((G3,G4),((V1,V2),((M3,(((G5,G6),(((C2,C3),G7),(G8,G9))),(M4,M5))),(G10,(((V3,(M6,M7)),C4),C5)))))),(V4,V5)),V6);	5	10	7	6
427	cl2927	-3				-3	((((G1,G2),M1),C1),V1);	1	2	1	1
428	cl2951	-2				-2	(((G1,((G2,M1),G3)),C1),V1);	1	3	1	1	G&M mis-ordered
429	cl2953	-3				-3	((((G1,G2),M1),C1),V1);	1	2	1	1
430	cl2972			-1		-1	(((((G1,G2),M1),((G3,G4),C1)),C2),V1);	2	4	1	1		C&C don't group together
431a	cl2978	-2				-2	(((C1,(((G1,G2),(G3,G4)),C2)),(((G5,G6),(((G7,G8),M1),C3)),V1)),V2);	2	4	0	1		C&C don't group together
431b	cl2978			-2		-2	(((C1,(((G1,G2),(G3,G4)),C2)),(((G5,G6),(((G7,G8),M1),C3)),V1)),V2);	1	4	1	1
432	cl298			-3		-3	((V1,((M1,C1),(G1,G2))),V2);	1	2	1	2
433	cl2984						(((((V1,C1),M1),(G1,(G2,M2))),C2),V2);	2	2	2	2
434	cl2992			-3		-3	((((G1,G2),C1),M1),V1);	1	2	1	1
435	cl3017	-3				-3	((((G1,G2),M1),C1),V1);	1	2	1	1
436	cl3027	-3				-3	(((((G1,G2),M1),C1),G3),V1);	1	2	1	1
437	cl304	-3				-3	((((G1,G2),M1),C1),V1);	1	2	1	1
438	cl3042	-3				-3	(((G1,G2),(M1,C1)),V1);	1	2	1	1
439	cl3055	-3				-3	((((G1,G2),M1),C1),V1);	1	2	1	1
440	cl3056						(((G1,(G2,M1)),C1),V1);	1	2	1	1
441	cl3066	-2				-2	(((((G1,G2),G3),M1),C1),V1);	1	3	1	1
442	cl3092	-2				-2	((((G1,(G2,G3)),M1),C1),V1);	1	3	1	1
443	cl3095						(((V1,((((G1,G2),M1),((G3,G4),((G5,G6),M2))),C1)),C2),V2);	2	6	2	2
444	cl3096	-3				-3	((((G1,G2),M1),C1),V1);	1	2	1	1
445	cl3103	-3				-3	((((G1,G2),M1),C1),V1);	1	2	1	1
446	cl3104	-3				-3	((((G1,G2),M1),C1),V1);	1	2	1	1
447	cl3105	-1				-1	((((((G1,G2),M1),(G3,G4)),C1),(G5,G6)),V1);	1	4	1	1
448	cl3114						((((G1,G2),(G3,(G4,(G5,G6)))),(((G7,G8),G9),(((M1,M2),((G10,G11),M3)),C1))),V1);	1	11	3	1
449	cl3117			-3		-3	((((G1,G2),M1),(G3,C1)),V1);	1	3	1	1
450	cl3135						((V1,(((((((G1,G2),(((G3,G4),M1),((G5,G6),((M2,M3),M4)))),((G7,G8),C1)),(((G9,G10),((G11,G12),M5)),C2)),(G13,G14)),(V2,(V3,(V4,V5)))),V6)),V7);	2	14	5	7	interesting retained duplicates
451	cl3138	-3				-3	((((G1,G2),M1),C1),V1);	1	2	1	1
452	cl3139	-3				-3	((((G1,G2),M1),C1),V1);	1	2	1	1
453	cl3144						((((G1,G2),((G3,(((M1,M2),M3),M4)),(G4,G5))),((G6,M5),C1)),V1);	1	6	5	1
454	cl3150		-1			-1	(((C1,C2),(((G1,G2),M1),(G3,(G4,G5)))),V1);	2	5	1	1	extra G
455	cl3157						(((C1,((G1,(((G2,G3),(G4,M1)),G5)),M2)),(((G6,G7),G8),M3)),V1);	1	8	3	1
456	cl3162	-1				-1	((V1,((M1,(G1,(G2,(G3,G4)))),C1)),V2);	1	4	1	2	G&M mis-ordered
457	cl3169						((V1,((((((G1,(G2,G3)),(M1,M2)),(G4,G5)),(G6,C1)),V2),C2)),V3);	2	6	2	3
458	cl3173	-3				-3	((((G1,G2),M1),C1),V1);	1	2	1	1
459	cl3177	-3				-3	((((G1,G2),M1),C1),V1);	1	2	1	1
460	cl3189	-3				-3	((((G1,G2),M1),C1),V1);	1	2	1	1
461	cl319						((((G1,G2),(G3,G4)),((V1,((G5,G6),M1)),(((G7,M2),C1),V2))),V3);	1	7	2	3	three V-Leg clades
462a	cl3206	-1				-1	(((V1,(V2,(V3,((G1,G2),((G3,G4),C1))))),(((G5,G6),((G7,G8),M1)),C2)),V4);	2	8	1	4
462b	cl3206			-3		-3	(((V1,(V2,(V3,((G1,G2),((G3,G4),C1))))),(((G5,G6),((G7,G8),M1)),C2)),V4);	2	8	1	4
463	cl3232			-3		-3	(((((G1,G2),M1),C1),G3),V1);	1	3	1	1
464	cl3252	-3				-3	((((G1,G2),M1),C1),V1);	1	2	1	1
465	cl326						((((G1,G2),(((V1,((V2,((G3,G4),((M1,M2),(G5,G6)))),V3)),((G7,G8),(M3,M4))),(G9,G10))),C1),V4);	1	10	4	4
466	cl3260						(((C1,(C2,(((G1,G2),(G3,(G4,G5))),M1))),((G6,G7),C3)),V1);	3	7	1	1
467	cl3276	-3				-3	(((G1,(G2,M1)),C1),V1);	1	2	1	1
468	cl3298	-1				-1	((V1,(((G1,G2),((G3,G4),M1)),C1)),V2);	1	4	1	2
469	cl3344	-1				-1	(((((G1,G2),G3),M1),C1),V1);	1	3	1	1
470	cl3351	-3				-3	((((G1,G2),M1),C1),V1);	1	2	1	1
471	cl3353	0				0	((((((G1,G2),M1),((G3,G4),M2)),C1),C2),V1);	2	4	2	1	clean, but Cfs don't cluster	C&C don't group together
472	cl3358	0				0	((C1,((((G1,G2),M1),((G3,G4),M2)),C2)),V1);	2	4	2	1	clean, but Cfs don't cluster	C&C don't group together
473	cl3374	-1				-1	((V1,(V2,(((G1,M1),(G2,G3)),C1))),V3);	1	3	1	3
474	cl3376	-3				-3	((((G1,G2),M1),C1),V1);	1	2	1	1
475	cl3379	-3				-3	((((G1,G2),M1),C1),V1);	1	2	1	1
476	cl3380						((((G1,(G2,M1)),(((M2,M3),C1),(G3,G4))),V1),V2);	1	4	3	2
477	cl3404						(((G1,(G2,C1)),M1),V1);	1	2	1	1
478	cl3409	-1				-1	(((V1,G1),((((G2,G3),(M1,M2)),(G4,M3)),C1)),V2);	1	3	3	1
479	cl3417	-2				-2	((((G1,(G2,G3)),M1),C1),V1);	1	3	1	1
480	cl3422						((((((M1,M2),C1),C2),(G1,G2)),V1),V2);	2	2	2	2
481	cl3425						(((M1,C1),(G1,G2)),V1);	1	2	1	1
482	cl3442						((((((G1,G2),(G3,M1)),((G4,G5),(M2,M3))),((G6,(G7,(((M4,M5),M6),(G8,M7)))),G9)),C1),V1);	1	9	7	1
483	cl3451						((((G1,(G2,G3)),M1),(G4,C1)),V1);	1	4	1	1
484	cl3465						((G1,(G2,((M1,M2),C1))),V1);	1	2	2	1
485	cl3473						(((((G1,G2),M1),((((V1,M2),(G3,C1)),G4),G5)),(C2,C3)),V2);	3	5	2	2
486	cl3474						((((M1,M2),(G1,G2)),C1),V1);	1	2	2	1
487	cl3493	0				0	(((((G1,(G2,G3)),M1),((G4,G5),M2)),C1),V1);	1	5	2	1	extra G
488	cl3504						(((V1,V2),(((V3,M1),(((G1,G2),G3),(((M2,M3),M4),(G4,(G5,G6))))),(((V4,(G7,G8)),(G9,M5)),C1))),V5);	1	9	5	5
489	cl3506						(((G1,(((G2,G3),M1),((G4,G5),M2))),(C1,((((V1,C2),C3),(G6,G7)),M3))),V2);	3	7	3	2
490	cl3509	-3				-3	((((G1,G2),M1),C1),V1);	1	2	1	1
491	cl352						((((M1,C1),((G1,G2),M2)),((G3,G4),G5)),V1);	1	5	2	1
492	cl3535						((((((C1,(((G1,G2),M1),C2)),(G3,G4)),V1),V2),((G5,G6),(G7,G8))),V3);	2	8	1	3
493b	cl3536	-2				-2	(((C1,(((G1,G2),M1),M2)),((G3,G4),C2)),V1);	2	4	2	1
494	cl3537						((((G1,((G2,G3),G4)),C1),M1),V1);	1	4	1	1
495	cl354						(((G1,G2),(((G3,G4),C1),M1)),V1);	1	4	1	1
496	cl3540	-3				-3	(((G1,(G2,M1)),C1),V1);	1	2	1	1
497	cl3547						((((M1,C1),(G1,G2)),(G3,G4)),V1);	1	4	1	1
498	cl3554						((((G1,G2),C1),(M1,C2)),V1);	2	2	1	1
499	cl3572	-3				-3	((((G1,G2),(M1,M2)),C1),V1);	1	2	2	1
500	cl359						(((C1,(((G1,G2),G3),M1)),C2),V1);	2	3	1	1
501	cl3594						(((C1,(M1,(G1,((G2,G3),G4)))),((G5,G6),G7)),V1);	1	7	1	1
502	cl3607	-1				-1	(((((G1,G2),M1),(G3,G4)),C1),V1);	1	4	1	1
503	cl3608	-3				-3	((((G1,G2),M1),C1),V1);	1	2	1	1
504	cl3615						((V1,(G1,((G2,(((M1,M2),C1),M3)),(G3,(G4,G5))))),V2);	1	5	3	2
505	cl3634						((C1,(((G1,M1),G2),M2)),V1);	1	2	2	1
506	cl3635	-3				-3	((((G1,G2),M1),C1),V1);	1	2	1	1
507	cl3652						((((((G1,G2),G3),((G4,(G5,G6)),((M1,M2),M3))),M4),C1),V1);	1	6	4	1
508	cl3662						((((G1,M1),(G2,G3)),((M2,M3),C1)),V1);	1	3	3	1
509	cl3663	-3				-3	((((G1,G2),M1),C1),V1);	1	2	1	1
510	cl3672						((((G1,G2),(M1,M2)),C1),V1);	1	2	2	1
511	cl3680	-2				-2	((((G1,G2),(G3,M1)),C1),V1);	1	3	1	1
512	cl3693						(((((((M1,M2),M3),C1),(G1,G2)),V1),(G3,G4)),V2);	1	4	3	2
513	cl3695	-3				-3	((((G1,G2),M1),C1),V1);	1	2	1	1
514	cl3696	-3				-3	((((G1,G2),M1),C1),V1);	1	2	1	1
515	cl3730	-3				-3	((((G1,G2),M1),C1),V1);	1	2	1	1
516	cl3737	-3				-3	((((G1,G2),M1),C1),V1);	1	2	1	1
517	cl3740	-1				-1	(((((G1,G2),M1),(G3,G4)),C1),V1);	1	4	1	1
518	cl3750	-3				-3	((((G1,G2),M1),C1),V1);	1	2	1	1
519a	cl3754	-3				-3	(((V1,(((((G1,G2),M1),C1),V2),((G3,G4),(G5,G6)))),((G7,G8),C2)),V3);	1	2	1	1	three V-Leg clades
520	cl3755						(((((G1,M1),G2),M2),C1),V1);	1	2	2	1
521	cl3759	-3				-3	((((G1,G2),M1),C1),V1);	1	2	1	1
522	cl3769						((C1,(((G1,G2),((((M1,M2),(G3,G4)),C2),((G5,G6),M3))),C3)),V1);	3	6	3	1
523	cl3776						(((((G1,G2),M1),C1),C2),V1);	2	2	1	1
524	cl379						((((G1,G2),C1),M1),V1);	1	2	1	1
525	cl3790						((((M1,((C1,C2),(G1,(G2,G3)))),M2),(G4,G5)),V1);	2	5	2	1
526	cl3795						(((((G1,G2),C1),M1),G3),V1);	1	3	1	1
527	cl3810						((C1,(V1,(((M1,M2),(G1,G2)),(((G3,G4),C2),(C3,((G5,(G6,(G7,M3))),G8)))))),V2);	3	8	3	2
528	cl3811	-3				-3	((((G1,G2),M1),C1),V1);	1	2	1	1
529	cl3813	-3				-3	((((G1,G2),M1),C1),V1);	1	2	1	1
530	cl3814	-3				-3	((((G1,G2),M1),C1),V1);	1	2	1	1
531	cl3815						(((((((C1,C2),(G1,G2)),(G3,C3)),V1),M1),(G4,G5)),V2);	3	5	1	2
532	cl3818						((((G1,M1),((G2,G3),C1)),((((C2,C3),(G4,G5)),(M2,M3)),(V1,M4))),V2);	3	5	4	2
533	cl382			-1		-1	((((G1,G2),M1),(C1,((G3,((G4,G5),G6)),G7))),V1);	1	7	1	1	extra G
534	cl3821	-2				-2	((((G1,(G2,G3)),M1),C1),V1);	1	3	1	1
535	cl3828	-3				-3	((((G1,G2),M1),C1),V1);	1	2	1	1
536	cl3833	-1				-1	((((G1,G2),((G3,G4),M1)),C1),V1);	1	4	1	1	clean
537	cl3846	-3				-3	(((((V1,C1),((G1,G2),M1)),C2),((V2,V3),(G3,((G4,G5),C3)))),V4);	3	5	1	4
538	cl3851	-3				-3	((((G1,G2),M1),C1),V1);	1	2	1	1
539	cl3875						((((G1,((G2,(((M1,C1),G3),G4)),G5)),M2),C2),V1);	2	5	2	1
540	cl388						((((G1,G2),M1),(C1,(V1,((G3,G4),C2)))),V2);	2	4	1	2
541	cl3893						(((M1,((G1,(G2,G3)),G4)),C1),V1);	1	4	1	1
542	cl394	-1				-1	(((((G1,G2),M1),(G3,G4)),C1),V1);	1	4	1	1	clean
543a	cl3975			-4		-4	(((((G1,G2),((G3,G4),M1)),C1),((V1,(((G5,G6),C2),(G7,G8))),(V2,(((G9,G10),M2),C3)))),V3);	3	10	2	3	three V-Leg clades
543b	cl3975	-1				-1	(((((G1,G2),((G3,G4),M1)),C1),((V1,(((G5,G6),C2),(G7,G8))),(V2,(((G9,G10),M2),C3)))),V3);	3	10	2	3	three V-Leg clades
543c	cl3975	-3				-3	(((((G1,G2),((G3,G4),M1)),C1),((V1,(((G5,G6),C2),(G7,G8))),(V2,(((G9,G10),M2),C3)))),V3);	3	10	2	3	three V-Leg clades
544	cl3986	-2				-2	((((((G1,G2),G3),M1),C1),V1),V2);	1	3	1	2
545	cl3990						((C1,((((G1,G2),G3),(((G4,G5),C2),C3)),M1)),V1);	3	5	1	1
546	cl3996	-3				-3	(((((G1,G2),M1),C1),V1),V2);	1	2	1	2
547a	cl3998	-3				-3	((V1,((((G1,G2),M1),C1),((((G3,G4),M2),C2),V2))),V3);	2	4	2	3	two V-Leg clades
547b	cl3998	-3				-3	((V1,((((G1,G2),M1),C1),((((G3,G4),M2),C2),V2))),V3);	2	4	2	3	two V-Leg clades
548	cl4006						((((C1,(((G1,G2),M1),C2)),C3),C4),V1);	4	2	1	1
549	cl4019	-3				-3	((((G1,G2),M1),C1),V1);	1	2	1	1
550	cl4026	-1				-1	((C1,((G1,(G2,G3)),M1)),V1);	1	3	1	1
551	cl4045						((((M1,((G1,(C1,(C2,(((M2,M3),(G2,G3)),(G4,G5))))),M4)),C3),C4),V1);	4	5	4	1
552	cl4047	-3				-3	((((G1,G2),M1),C1),V1);	1	2	1	1
553	cl4062						(((((G1,M1),C1),G2),((G3,C2),(G4,G5))),V1);	2	5	1	1
554	cl4066				-4	-4	(((((G1,G2),M1),(C1,C2)),M2),V1);	2	2	2	1		or could be H2a (-2) if Mt is mis-placed
555	cl4071	-3				-3	((((G1,G2),M1),C1),V1);	1	2	1	1
556	cl4074						((V1,(((((G1,G2),M1),G3),V2),(G4,C1))),V3);	1	4	1	3
557	cl4096	-3				-3	((((G1,G2),M1),C1),V1);	1	2	1	1
558	cl4099	-2				-2	((((G1,M1),(G2,G3)),C1),V1);	1	3	1	1
559	cl410	-3				-3	((((G1,G2),M1),C1),V1);	1	2	1	1
560	cl4124						((((G1,G2),C1),M1),V1);	1	2	1	1
561	cl4125						(((G1,G2),(M1,C1)),V1);	1	2	1	1
562a	cl4136	-2				-2	((((V1,(((G1,G2),((G3,G4),M1)),C1)),((((G5,G6),(G7,G8)),C2),((G9,M2),V2))),(G10,(G11,G12))),V3);	1	4	0	1	three V-Leg clades
562b	cl4136	-1				-1	((((V1,(((G1,G2),((G3,G4),M1)),C1)),((((G5,G6),(G7,G8)),C2),((G9,M2),V2))),(G10,(G11,G12))),V3);	1	4	1	1	three V-Leg clades
563	cl4141	-3				-3	((((M1,M2),(G1,G2)),C1),V1);	1	2	2	1	extra M
564a	cl419	-1				-1	(((((G1,G2),((G3,G4),M1)),C1),(((G5,G6),(V1,C2)),(C3,(((G7,G8),M2),((G9,G10),M3))))),V2);	1	4	1	1	three V-Leg clades
564b	cl419	0				0	(((((G1,G2),((G3,G4),M1)),C1),(((G5,G6),(V1,C2)),(C3,(((G7,G8),M2),((G9,G10),M3))))),V2);	1	4	2	0	three V-Leg clades
565	cl4208						(((G1,(G2,((V1,(V2,(((G3,G4),M1),C1))),C2))),((G5,(G6,M2)),C3)),V3);	3	6	2	3
566	cl4211						(((((G1,G2),(G3,G4)),C1),M1),V1);	1	4	1	1
567	cl4231						((C1,(G1,(G2,(((C2,C3),M1),V1)))),V2);	3	2	1	2
568	cl4234	-1				-1	((G1,(C1,((G2,G3),((G4,(G5,G6)),M1)))),V1);	1	6	1	1	extra G
569	cl4239						(((((V1,V2),V3),((((G1,G2),G3),G4),(((C1,((M1,M2),((M3,M4),(G5,M5)))),G6),G7))),V4),V5);	1	7	5	5
570	cl4240	-3				-3	((((G1,G2),M1),C1),V1);	1	2	1	1
571	cl4246	-3				-3	((((G1,G2),((M1,M2),M3)),C1),V1);	1	2	3	1	extra M
572	cl425	-1				-1	((V1,((((G1,G2),M1),(G3,M2)),C1)),V2);	1	3	2	2
573	cl4255						((((((G1,G2),(G3,G4)),(M1,C1)),C2),V1),V2);	2	4	1	2
574	cl4261	-3				-3	((C1,((G1,(G2,G3)),M1)),V1);	1	3	1	1	extra G
575	cl4283						(((M1,C1),(G1,G2)),V1);	1	2	1	1
576	cl4285	-1				-1	(((((G1,G2),(G3,(G4,G5))),(((G6,G7),G8),M1)),C1),V1);	1	8	1	1	extra G
577	cl4288	-3				-3	((((G1,G2),M1),C1),V1);	1	2	1	1
578	cl4294	-3				-3	((((G1,G2),M1),C1),V1);	1	2	1	1
579	cl43						(((V1,((G1,G2),G3)),((G4,G5),((((G6,M1),C1),G7),G8))),V2);	1	8	1	2
580	cl4305	-3				-3	((((G1,G2),M1),C1),V1);	1	2	1	1
581	cl4306	-3				-3	((((G1,G2),M1),C1),V1);	1	2	1	1
582	cl4312	-3				-3	((((G1,G2),M1),C1),V1);	1	2	1	1
583	cl4315				-3	-3	((((C1,C2),((G1,G2),M1)),(G3,G4)),V1);	2	4	1	1
584	cl432	-3				-3	((((G1,G2),M1),C1),V1);	1	2	1	1
585	cl4321	-2				-2	((((G1,G2),(M1,M2)),C1),V1);	1	2	2	1
586	cl4324	-1				-1	((((((G1,G2),M1),(G3,G4)),C1),V1),V2);	1	4	1	2
587	cl4328	-3				-3	((((G1,G2),M1),C1),V1);	1	2	1	1
588	cl4337						((((((G1,G2),M1),C1),M2),(G3,G4)),V1);	1	4	2	1
589	cl4358						(((C1,M1),((((G1,G2),M2),C2),(V1,C3))),V2);	3	2	2	2
590	cl4362	-2				-2	((((G1,((G2,G3),M1)),C1),V1),V2);	1	3	1	2
591	cl4364						((((G1,(G2,M1)),M2),C1),V1);	1	2	2	1
592	cl4385						(((G1,((G2,G3),(C1,M1))),C2),V1);	2	3	1	1
593	cl4394						((((G1,G2),G3),(M1,C1)),V1);	1	3	1	1
594	cl4405	-3				-3	((((G1,G2),M1),C1),V1);	1	2	1	1
595	cl4412						((M1,(((((G1,(G2,(G3,(((G4,G5),M2),(((V1,((G6,G7),C1)),V2),C2))))),(G8,(((G9,G10),C3),G11))),G12),C4),C5)),V3);	5	12	2	3	three V-Leg clades
596	cl4417	-2				-2	((((M1,M2),(G1,(G2,(G3,G4)))),C1),V1);	1	4	2	1	mis-ordered G
597a	cl4424	-3				-3	((((V1,((((G1,G2),G3),M1),(G4,G5))),(((G6,G7),M2),C1)),V2),V3);	1	2	1	2	two V-Leg clades
598	cl4440						((G1,(((G2,M1),C1),G3)),V1);	1	3	1	1
599	cl4454	-3				-3	((((G1,G2),M1),C1),V1);	1	2	1	1
600x	cl4466	-3				-3	((((((G1,G2),M1),C1),V1),((G3,G4),(G5,G6))),V2);	1	2	1	1	two V-Leg clades
601	cl4467						((G1,((((G2,G3),M1),G4),C1)),V1);	1	4	1	1
602b	cl4470	-1				-1	((((G1,G2),M1),(((G3,G4),((G5,G6),M2)),C1)),V1);	1	4	1	1
603	cl4482						((((G1,((M1,M2),M3)),((G2,G3),G4)),C1),V1);	1	4	3	1
604	cl4484	-2				-2	((V1,((((G1,G2),G3),M1),C1)),V2);	1	3	1	2
605	cl4485	-3				-3	((((G1,G2),M1),C1),V1);	1	2	1	1
606	cl4504			-3		-3	(((G1,G2),((G3,M1),C1)),V1);	1	3	1	1
607	cl4508	-3				-3	((((G1,G2),M1),C1),V1);	1	2	1	1
608a	cl4515			-2		-2	(((((G1,M1),C1),((G2,G3),C2)),(M2,((((G4,G5),M3),C3),(G6,G7)))),V1);	2	3	1	0
608b	cl4515			-2		-2	(((((G1,M1),C1),((G2,G3),C2)),(M2,((((G4,G5),M3),C3),(G6,G7)))),V1);	1	4	2	1	may be -1 if M is misplaced
609	cl4519	-1				-1	((C1,(((G1,G2),(G3,G4)),M1)),V1);	1	4	1	1	mis-ordered M
610	cl4546	-3				-3	((((G1,G2),M1),C1),V1);	1	2	1	1
611	cl455	0				0	((((((G1,G2),M1),((G3,G4),M2)),C1),V1),V2);	1	4	2	2	clean
612	cl4554						(((M1,C1),(V1,((((G1,G2),M2),C2),(((G3,G4),M3),C3)))),V2);	3	4	3	2
613	cl4565			-2		-2	((C1,(((G1,G2),C2),((G3,G4),M1))),V1);	2	4	1	1		C&C don't group together
614	cl4585						(((V1,((G1,((G2,G3),C1)),(C2,((G4,(G5,G6)),((((M1,M2),M3),(M4,M5)),G7))))),V2),V3);	2	7	5	3
615	cl4599						(((G1,((G2,G3),M1)),((G4,(M2,M3)),C1)),V1);	1	4	3	1
616	cl4601	0				0	(((((M1,M2),(G1,G2)),((G3,G4),M3)),C1),V1);	1	4	3	1	extra M
617a	cl4605	-3				-3	((((V1,(((G1,G2),M1),C1)),(V2,(((M2,M3),(G3,G4)),C2))),(((G5,G6),G7),G8)),V3);	2	8	3	3	three V-Leg clades
617a	cl4605	-2				-2	((((V1,(((G1,G2),M1),C1)),(V2,(((M2,M3),(G3,G4)),C2))),(((G5,G6),G7),G8)),V3);	2	8	3	3	three V-Leg clades
618	cl4607	-3				-3	((((G1,G2),M1),C1),V1);	1	2	1	1
619	cl4616			-3		-3	(((((G1,G2),M1),C1),C2),V1);	2	2	1	1
620	cl4626	-3				-3	(((((G1,G2),M1),C1),(V1,C2)),V2);	2	2	1	2
621	cl4627	-3				-3	(((((G1,G2),M1),C1),(((G3,G4),M2),C2)),V1);	2	4	2	1
622	cl4636	-3				-3	((((G1,G2),M1),C1),V1);	1	2	1	1
623	cl4638	-3				-3	((((G1,G2),M1),C1),V1);	1	2	1	1
624	cl4647						((V1,((((G1,G2),(G3,G4)),C1),M1)),V2);	1	4	1	2
625	cl4657						((((G1,(G2,G3)),M1),C1),V1);	1	3	1	1
626	cl4658			-4		-4	(((M1,C1),(G1,G2)),V1);	1	2	1	1
627	cl4662	-3				-3	((((G1,G2),M1),C1),V1);	1	2	1	1
628	cl4666						(((((G1,G2),(M1,M2)),(G3,(G4,M3))),C1),V1);	1	4	3	1
629	cl4673						(((C1,C2),(((G1,G2),M1),M2)),V1);	2	2	2	1
630	cl4674	-3				-3	((((G1,G2),M1),C1),V1);	1	2	1	1
631	cl4679						(((G1,(G2,M1)),C1),V1);	1	2	1	1
632	cl4684	-2				-2	(((((G1,G2),G3),M1),C1),V1);	1	3	1	1
633	cl4687						(((V1,((G1,G2),C1)),(((G3,(G4,G5)),(G6,G7)),(C2,M1))),V2);	2	7	1	2
634	cl4695						(((G1,G2),(M1,C1)),V1);	1	2	1	1
635	cl470		-2			-2	((((((G1,G2),M1),M2),(C1,C2)),V1),V2);	2	2	2	2
636	cl4718	-3				-3	((((G1,G2),M1),C1),V1);	1	2	1	1
637	cl472	-3				-3	((((G1,G2),M1),C1),V1);	1	2	1	1
638	cl4756	-3				-3	((M1,(((G1,G2),M2),C1)),V1);	1	2	2	1
639	cl4759						(((G1,(V1,((G2,G3),M1))),C1),V2);	1	3	1	2
640	cl4762	-3				-3	((((G1,G2),M1),C1),V1);	1	2	1	1
641	cl4763						(((((G1,M1),M2),(G2,G3)),C1),V1);	1	3	2	1
642	cl4779						(((((G1,G2),((M1,M2),G3)),G4),C1),V1);	1	4	2	1
643	cl4790	-3				-3	(((((G1,G2),M1),C1),V1),V2);	1	2	1	2
644a	cl4801	-2				-2	((((V1,((G1,G2),(M1,C1))),V2),(C2,(((G3,G4),(M2,((V3,((((G5,G6),(G7,G8)),C3),V4)),((G9,G10),C4)))),((G11,G12),G13)))),V5);	1	4	0	1	three V-Leg clades
644b	cl4801			-3		-3	((((V1,((G1,G2),(M1,C1))),V2),(C2,(((G3,G4),(M2,((V3,((((G5,G6),(G7,G8)),C3),V4)),((G9,G10),C4)))),((G11,G12),G13)))),V5);	1	2	1	1	three V-Leg clades
645	cl481	-3				-3	((((G1,G2),M1),C1),V1);	1	2	1	1
646	cl4812	-3				-3	(((G1,(G2,M1)),C1),V1);	1	2	1	1
647	cl4813	-3				-3	((((G1,G2),M1),C1),V1);	1	2	1	1
648	cl4815	-2				-2	((V1,(V2,(C1,((G1,(G2,G3)),(G4,M1))))),V3);	1	4	1	3
649	cl482	-3				-3	((((G1,G2),M1),C1),V1);	1	2	1	1
650	cl4823	-3				-3	((((G1,G2),M1),C1),V1);	1	2	1	1
651b	cl4828			-2		-2	((((((C1,(((G1,G2),G3),G4)),((M1,M2),(G5,G6))),(((G7,G8),M3),(G9,G10))),(V1,V2)),V3),V4);	1	6	2	1	extra G&M
652	cl4833	-3				-3	((((G1,(G2,M1)),C1),(G3,C2)),V1);	2	3	1	1
653	cl4843						(((V1,((G1,G2),((G3,G4),M1))),(((G5,G6),C1),V2)),V3);	1	6	1	3
654	cl4853	-3				-3	((((G1,G2),M1),C1),V1);	1	2	1	1
655	cl4872	-3				-3	(((G1,(G2,M1)),C1),V1);	1	2	1	1
656	cl4881						(((((G1,G2),((M1,M2),(M3,M4))),(((G3,(G4,G5)),(G6,G7)),(G8,C1))),V1),V2);	1	8	4	2
657	cl4888						(((G1,G2),(M1,C1)),V1);	1	2	1	1
658	cl4890	-2				-2	((((G1,(G2,G3)),M1),C1),V1);	1	3	1	1
659a	cl4899	-2				-2	(((((G1,G2),M1),M2),(V1,((G3,M3),C1))),V2);	1	2	2	1
660	cl4900						((M1,((C1,M2),(G1,(G2,G3)))),V1);	1	3	2	1
661	cl4902	-3				-3	((((G1,G2),M1),C1),V1);	1	2	1	1
662	cl4911	-3				-3	((((G1,G2),M1),C1),V1);	1	2	1	1
663	cl4918			-2		-2	(((((G1,G2),M1),C1),(G3,G4)),V1);	1	4	1	1
664	cl4919						((M1,(((G1,G2),(G3,G4)),C1)),V1);	1	4	1	1
665	cl4920	-3				-3	((((G1,G2),M1),C1),V1);	1	2	1	1
666	cl4951	-3				-3	((((G1,G2),M1),C1),V1);	1	2	1	1
667a	cl4952	-3				-3	(((((((G1,G2),M1),C1),V1),(V2,(C2,(((G3,G4),M2),((G5,G6),M3))))),((G7,G8),((G9,(M4,M5)),C3))),V3);	1	2	1	1	three V-Leg clades
667b	cl4952	0				0	(((((((G1,G2),M1),C1),V1),(V2,(C2,(((G3,G4),M2),((G5,G6),M3))))),((G7,G8),((G9,(M4,M5)),C3))),V3);	1	4	2	1	three V-Leg clades	Nice "complete" triplicated tree
667c	cl4952						(((((((G1,G2),M1),C1),V1),(V2,(C2,(((G3,G4),M2),((G5,G6),M3))))),((G7,G8),((G9,(M4,M5)),C3))),V3);	1	3	2	1	three V-Leg clades	This clade not scored because of odd branching order
668	cl4955	-3				-3	((((G1,G2),M1),C1),V1);	1	2	1	1
669	cl4964	-3				-3	((((G1,G2),M1),C1),V1);	1	2	1	1
670	cl4966	-2				-2	((C1,((G1,(G2,G3)),M1)),V1);	1	3	1	1
671	cl4971	-1				-1	((C1,(V1,(C2,((((G1,G2),M1),(G3,(G4,G5))),C3)))),V2);	3	5	1	2	extra G	C&C don't group together
672	cl4974						((((G1,G2),G3),((G4,M1),C1)),V1);	1	4	1	1
673	cl499						(((((G1,G2),M1),C1),G3),V1);	1	3	1	1
674	cl4999	-1				-1	((V1,((((G1,G2),M1),(G3,G4)),C1)),V2);	1	4	1	2
675	cl50						((((G1,G2),C1),M1),V1);	1	2	1	1
676	cl5015	-3				-3	((((G1,G2),M1),C1),V1);	1	2	1	1
677a	cl5016	-1				-1	(((G1,(G2,(G3,M1))),((G4,((V1,C1),M2)),(((G5,(G6,G7)),V2),(V3,((C2,(((G8,G9),G10),((G11,G12),M3))),C3))))),V4);	2	5	1	1	three V-Leg clades	C&C don't group together
678	cl5017	-3				-3	((((G1,G2),M1),C1),V1);	1	2	1	1
679	cl503	-2				-2	((V1,(V2,((((G1,G2),M1),M2),C1))),V3);	1	2	2	3
680	cl5032	-1				-1	((C1,((G1,((G2,G3),G4)),M1)),V1);	1	4	1	1	G&M mis-ordered
681	cl5048	-2				-2	((((G1,(G2,G3)),M1),C1),V1);	1	3	1	1	G&M mis-ordered
682b	cl5055	-2				-2	((((G1,G2),M1),(((G3,G4),(G5,G6)),(((V1,((V2,(((G7,G8),(G9,G10)),C1)),C2)),((V3,V4),((V5,C3),(G11,(G12,(G13,G14)))))),C4))),V6);	1	4	1	1
683a	cl5056	-3				-3	(((V1,(V2,(((G1,G2),M1),C1))),(C2,(M2,(((G3,(G4,G5)),G6),G7)))),V3);	1	2	1	1	three V-Leg clades
683b	cl5056	-1				-1	(((V1,(V2,(((G1,G2),M1),C1))),(C2,(M2,(((G3,(G4,G5)),G6),G7)))),V3);	1	4	1	1	G&M mis-ordered
684	cl5098	-3				-3	(((((G1,G2),(M1,M2)),C1),V1),V2);	1	2	2	2	extra M
685	cl5111						((C1,(((G1,G2),M1),M2)),V1);	1	2	2	1
686	cl5131	-2				-2	((((M1,M2),(G1,G2)),C1),V1);	1	2	2	1
687	cl5141						((C1,((C2,M1),((((V1,G1),C3),M2),(G2,G3)))),V2);	3	3	2	2
688	cl5144						(((G1,G2),(M1,C1)),V1);	1	2	1	1
689	cl5148						(((((((V1,V2),(V3,V4)),((V5,V6),((V7,V8),V9))),(V10,(V11,V12))),((V13,V14),((M1,M2),((((G1,G2),C1),G3),(G4,G5))))),V15),V16);	1	5	2	16
690	cl5149						(((((V1,(G1,M1)),(G2,V2)),C1),G3),V3);	1	3	1	3
691	cl5151	-3				-3	((((M1,M2),(G1,G2)),C1),V1);	1	2	2	1	extra M
692	cl5155	-1				-1	(((((G1,(G2,G3)),M1),C1),(V1,V2)),V3);	1	3	1	3
693	cl5161						(((G1,G2),(C1,M1)),V1);	1	2	1	1
694	cl5164	-1				-1	((((G1,G2),((G3,G4),M1)),C1),V1);	1	4	1	1
695	cl5179	-3				-3	((((G1,G2),M1),C1),V1);	1	2	1	1
696	cl5190						((V1,((G1,((G2,(G3,G4)),(G5,(G6,((V2,C1),M1))))),(G7,G8))),V3);	1	8	1	3
697	cl5202						(((C1,((V1,V2),(C2,((G1,(G2,G3)),M1)))),(((G4,G5),M2),C3)),V3);	3	5	2	3
698	cl521	-1				-1	((V1,((((G1,G2),M1),(G3,G4)),C1)),V2);	1	4	1	2
699	cl5229	-3				-3	((((G1,G2),M1),C1),V1);	1	2	1	1
700	cl523	-3				-3	((((G1,G2),M1),C1),V1);	1	2	1	1
701	cl5230						(((C1,(M1,(G1,(((V1,C2),G2),G3)))),(G4,G5)),V2);	2	5	1	2
702	cl5232	-3				-3	(((((G1,G2),M1),C1),C2),V1);	2	2	1	1
703	cl5259						(((G1,M1),((G2,G3),C1)),V1);	1	3	1	1
704	cl5264	-3				-3	(((((G1,G2),M1),C1),V1),V2);	1	2	1	2
705	cl5286	-3				-3	(((((G1,G2),M1),C1),V1),V2);	1	2	1	2
706a	cl5287	-2				-2	((V1,((V2,V3),((V4,V5),(((G1,G2),C1),(C2,(G3,((G4,G5),M1))))))),V6);	2	3	1	1
707	cl5288	-3				-3	((((G1,G2),M1),C1),V1);	1	2	1	1
708	cl5290	-3				-3	((((G1,G2),M1),C1),V1);	1	2	1	1
709	cl5291						((((G1,G2),C1),M1),V1);	1	2	1	1
710a	cl5298	-1				-1	((((C1,((G1,G2),(G3,(G4,M1)))),V1),(((G5,G6),M2),C2)),V2);	1	4	1	1	two V-Leg clades
710b	cl5298	-3				-3	((((C1,((G1,G2),(G3,(G4,M1)))),V1),(((G5,G6),M2),C2)),V2);	1	2	1	1	two V-Leg clades
711	cl5326	-1				-1	((((G1,G2),((G3,G4),M1)),C1),V1);	1	4	1	1
712	cl5334						(((V1,((G1,((G2,(M1,C1)),G3)),(V2,V3))),(V4,V5)),V6);	1	3	1	6
713	cl5338	-2				-2	((((G1,G2),(M1,M2)),C1),V1);	1	2	2	1
714	cl5345						((((((G1,G2),G3),(((M1,M2),M3),M4)),(G4,C1)),V1),V2);	1	4	4	2
715	cl5349	-3				-3	((((G1,G2),M1),C1),V1);	1	2	1	1
716	cl535	-1				-1	((((G1,M1),((G2,G3),M2)),C1),V1);	1	3	2	1	clean
717	cl5351	-1				-1	(((((G1,G2),((G3,M1),M2)),C1),C2),V1);	2	3	2	1	Cs don't group together	C&C don't group together
718	cl5364	-3				-3	((((G1,G2),M1),C1),V1);	1	2	1	1
719	cl5372						(((G1,C1),(((((((G2,G3),M1),M2),M3),C2),V1),V2)),V3);	2	3	3	3
720	cl5378	-3				-3	((((G1,G2),M1),C1),V1);	1	2	1	1
721	cl539			-1		-1	((((G1,G2),M1),(((G3,G4),M2),C1)),V1);	1	4	2	1
722	cl5393	-3				-3	((((M1,M2),(G1,G2)),C1),V1);	1	2	2	1	extra M
723	cl5394	-3				-3	((((G1,G2),M1),C1),V1);	1	2	1	1
724	cl5395						(((G1,G2),(((G3,G4),C1),M1)),V1);	1	4	1	1
725a	cl5411	-3				-3	(((G1,G2),(((G3,G4),C1),M1)),V1);	1	2	1	1	two V-Leg clades
725b	cl5411	-3				-3	(((((G1,G2),M1),C1),((((G3,G4),M2),C2),V1)),V2);	1	2	1	1	two V-Leg clades
726	cl542	-3				-3	((((G1,G2),M1),C1),V1);	1	2	1	1
727	cl5427	-3				-3	((((G1,G2),M1),C1),V1);	1	2	1	1
728	cl5442						(((M1,C1),(G1,G2)),V1);	1	2	1	1
729	cl5449	-1				-1	(((((G1,G2),M1),(G3,G4)),C1),V1);	1	4	1	1
730	cl5455						(((((G1,G2),M1),C1),C2),V1);	2	2	1	1
731	cl5465	-3				-3	((((G1,G2),M1),C1),V1);	1	2	1	1
732	cl5472	-3				-3	((((G1,G2),M1),C1),V1);	1	2	1	1
733a	cl5473	0				0	((V1,(((V2,(G1,G2)),M1),(((((G3,G4),M2),(G5,G6)),M3),C1))),V3);	1	4	2	1	G&M mis-ordered
734	cl5482	-3				-3	((((G1,G2),M1),C1),V1);	1	2	1	1
735	cl5495	-1				-1	((((G1,G2),((G3,G4),M1)),C1),V1);	1	4	1	1
736	cl550	-3				-3	((((M1,M2),(G1,G2)),C1),V1);	1	2	2	1	extra M
737	cl5502			-4		-4	(((G1,G2),(M1,C1)),V1);	1	2	1	1
738	cl5515	-3				-3	((((G1,G2),M1),C1),V1);	1	2	1	1
739	cl5517						((((G1,G2),C1),(((G3,G4),(G5,G6)),M1)),V1);	1	6	1	1
740	cl5522						((G1,(M1,(((C1,C2),G2),G3))),V1);	2	3	1	1
741	cl5533	-3				-3	((((G1,G2),M1),C1),V1);	1	2	1	1
742a	cl554	-3				-3	(((((G1,G2),M1),C1),((G3,G4),M2)),V1);	1	2	1	1
743	cl5543	-2				-2	((V1,(((G1,M1),(G2,G3)),C1)),V2);	1	3	1	2
744a	cl5544	-3				-3	(((V1,(((G1,G2),M1),C1)),C2),V2);	1	2	1	1
745a	cl5553	-2				-2	((((((G1,G2),(G3,G4)),C1),V1),(((G5,G6),((G7,G8),M1)),C2)),V2);	1	4	0	1	two V-Leg clades
745b	cl5553	-1				-1	((((((G1,G2),(G3,G4)),C1),V1),(((G5,G6),((G7,G8),M1)),C2)),V2);	1	4	1	1	two V-Leg clades
746	cl5556						(((M1,M2),(((G1,(G2,G3)),G4),C1)),V1);	1	4	2	1
747	cl5563	-3				-3	(((((G1,G2),M1),C1),V1),V2);	1	2	1	2
748	cl5565	-1				-1	((C1,(M1,((G1,(G2,G3)),G4))),V1);	1	4	1	1	G&M mis-ordered
749a	cl5574			-2		-2	(((((G1,G2),C1),(V1,(V2,((G3,M1),(((G4,G5),M2),C2))))),(((G6,G7),M3),C3)),V3);	1	3	2	1	three V-Leg clades
749b	cl5574	-3				-3	(((((G1,G2),C1),(V1,(V2,((G3,M1),(((G4,G5),M2),C2))))),(((G6,G7),M3),C3)),V3);	1	2	1	1	three V-Leg clades
750	cl5580	-3				-3	((((G1,G2),M1),C1),V1);	1	2	1	1
751	cl5581	-3				-3	((((G1,G2),M1),C1),V1);	1	2	1	1
752	cl5594	-3				-3	((((G1,G2),M1),C1),V1);	1	2	1	1
753	cl560	-2				-2	((((G1,G2),(M1,M2)),C1),V1);	1	2	2	1
754	cl5608	-1				-1	(((((G1,G2),M1),(G3,G4)),C1),V1);	1	4	1	1
755	cl561	-3				-3	((((G1,G2),M1),C1),V1);	1	2	1	1
756	cl5618						((((G1,G2),C1),M1),V1);	1	2	1	1
757b	cl5623	-3				-3	((((((((G1,G2),G3),C1),(G4,G5)),(M1,M2)),(((G6,G7),M3),C2)),V1),V2);	1	2	1	2
758	cl5627						((C1,((M1,C2),((G1,C3),(G2,C4)))),V1);	4	2	1	1
759	cl5637	-2				-2	((((G1,(G2,G3)),M1),C1),V1);	1	3	1	1
760	cl5639						(((((G1,G2),(G3,G4)),(M1,C1)),(C2,(((G5,G6),((V1,V2),V3)),C3))),V4);	3	6	1	4
761	cl5642						((G1,(((G2,G3),(((G4,G5),((G6,G7),(G8,((((M1,M2),M3),(((M4,M5),M6),M7)),(G9,G10))))),C1)),G11)),V1);	1	11	7	1
762	cl565	-1				-1	((((G1,M1),((G2,G3),M2)),C1),V1);	1	3	2	1
763	cl5657	-3				-3	((((G1,G2),M1),C1),V1);	1	2	1	1
764	cl5664			-4		-4	((((G1,G2),C1),M1),V1);	1	2	1	1
765	cl5691						((((M1,C1),(G1,G2)),C2),V1);	2	2	1	1
766	cl57	-3				-3	((((G1,G2),M1),C1),V1);	1	2	1	1
767	cl5702			-4		-4	((((G1,G2),C1),M1),V1);	1	2	1	1
768	cl5703			-4		-4	(((V1,V2),((M1,C1),(G1,G2))),V3);	1	2	1	3
769	cl5707	-2				-2	((((M1,M2),(G1,G2)),C1),V1);	1	2	2	1	G&M mis-ordered
770	cl5708		-3			-3	((((((G1,G2),M1),C1),C2),V1),V2);	2	2	1	2	Cs don't group together
771a	cl5720	0				0	((((C1,M1),(((G1,G2),M2),(G3,(G4,G5)))),(((G6,(G7,M3)),C2),C3)),V1);	1	5	2	1	G&M mis-ordered
771b	cl5720	-3				-3	((((C1,M1),(((G1,G2),M2),(G3,(G4,G5)))),(((G6,(G7,M3)),C2),C3)),V1);	1	2	1	0
772	cl574	-3				-3	((((G1,G2),M1),C1),V1);	1	2	1	1
773	cl5759	-2				-2	((((G1,(G2,G3)),M1),C1),V1);	1	3	1	1	G&M mis-ordered
774	cl5765						(((((G1,(G2,G3)),(((G4,(G5,G6)),(G7,G8)),(M1,C1))),((((C2,(((G9,(G10,((G11,G12),((G13,G14),(G15,(((G16,G17),((G18,(G19,G20)),G21)),G22)))))),M2),C3)),((V1,V2),(((G23,G24),M3),C4))),(V3,V4)),((C5,(((G25,M4),M5),G26)),V5))),V6),V7);	5	26	5	7		A large, complex family
775a	cl5780	-2				-2	((((((G1,G2),M1),(M2,M3)),C1),(V1,((G3,G4),M4))),V2);	1	2	3	1	extra M
776	cl5789						((((C1,(C2,((((G1,G2),C3),M1),G3))),(C4,M2)),C5),V1);	5	3	2	1
777a	cl5802	-3				-3	((((((G1,G2),M1),C1),V1),(G3,G4)),V2);	1	2	1	1
778	cl5807	-1				-1	((((G1,((G2,(G3,G4)),G5)),M1),C1),V1);	1	5	1	1	extra G
779	cl5813						(((((((G1,G2),M1),M2),C1),G3),V1),V2);	1	3	2	2
780	cl5818	-2				-2	(((G1,((G2,G3),M1)),C1),V1);	1	3	1	1
781	cl584	-2				-2	((C1,((G1,(G2,G3)),M1)),V1);	1	3	1	1
782	cl5842						(((C1,(G1,((((G2,G3),(G4,G5)),G6),C2))),(G7,M1)),V1);	2	7	1	1
783	cl5855	-3				-3	((((G1,G2),M1),C1),V1);	1	2	1	1
784	cl5858	-3				-3	((((G1,G2),M1),C1),V1);	1	2	1	1
785	cl5875						((((G1,((M1,M2),G2)),C1),M3),V1);	1	2	3	1
786	cl5879	-3				-3	((((G1,G2),M1),C1),V1);	1	2	1	1
787	cl5886	-3				-3	(((G1,(G2,M1)),C1),V1);	1	2	1	1
788a	cl5891	-1				-1	(((V1,(C1,(M1,(G1,(G2,(G3,G4)))))),((((G5,G6),C2),(G7,G8)),V2)),V3);	1	4	1	1	three V-Leg clades
788b	cl5891			-2		-2	(((V1,(C1,(M1,(G1,(G2,(G3,G4)))))),((((G5,G6),C2),(G7,G8)),V2)),V3);	1	4	0	1	three V-Leg clades
789	cl5898	-3				-3	((C1,(((G1,G2),M1),G3)),V1);	1	3	1	1
790	cl5909						((((((G1,G2),C1),M1),M2),C2),V1);	2	2	2	1
791	cl5910	-3				-3	((((G1,G2),M1),C1),V1);	1	2	1	1
792	cl5912	-2				-2	((((G1,M1),(G2,G3)),C1),V1);	1	3	1	1
793	cl5915	-3				-3	((((G1,G2),M1),C1),V1);	1	2	1	1
794	cl5918						(((((G1,G2),C1),V1),((G3,G4),((G5,G6),M1))),V2);	1	6	1	2
795	cl5922						(((G1,G2),(C1,(((G3,G4),G5),M1))),V1);	1	5	1	1
796	cl5930	-3				-3	((((G1,G2),M1),C1),V1);	1	2	1	1
797	cl5932						((G1,(C1,(((G2,G3),M1),M2))),V1);	1	3	2	1
798	cl5934	-2				-2	((((G1,(G2,G3)),M1),C1),V1);	1	3	1	1
799a	cl5936	-3				-3	(((((G1,G2),M1),C1),((((G3,G4),M2),C2),V1)),V2);	1	2	1	1
799b	cl5936	-3				-3	(((((G1,G2),M1),C1),((((G3,G4),M2),C2),V1)),V2);	1	2	1	1
800	cl5942	-3				-3	((((G1,G2),M1),C1),V1);	1	2	1	1
801	cl5946	-2				-2	(((((((G1,G2),M1),G3),C1),(G4,G5)),V1),V2);	1	5	1	2
802	cl5948	-3				-3	((((G1,G2),M1),C1),V1);	1	2	1	1
803	cl5970						((G1,(G2,((M1,C1),G3))),V1);	1	3	1	1
804	cl5975	-2				-2	(((((G1,G2),(G3,(M1,M2))),C1),V1),V2);	1	3	2	2	extra M
805	cl5984	-2				-2	((V1,(C1,((G1,(G2,G3)),M1))),V2);	1	3	1	2
806	cl5992	-2				-2	((C1,(((G1,G2),G3),M1)),V1);	1	3	1	1
807a	cl5994	-3				-3	((((((G1,G2),M1),C1),(V1,C2)),(((G3,G4),M2),C3)),V2);	1	2	1	1	three V-Leg clades
807b	cl5994	-3				-3	((((((G1,G2),M1),C1),(V1,C2)),(((G3,G4),M2),C3)),V2);	1	2	1	1	three V-Leg clades	Gives a clue about how an extra C may occur outside a Leg clade: ((C,V),(C,(papilionoid))) --> (C,(C,(papilionoid)))
808	cl6000			-4		-4	((((G1,G2),C1),M1),V1);	1	2	1	1
809	cl6008	-3				-3	((((M1,M2),(G1,G2)),C1),V1);	1	2	2	1	extra M
810	cl6025						((((V1,(V2,((V3,V4),((V5,V6),V7)))),((((V8,((V9,(((((V10,V11),(V12,V13)),V14),(V15,(((G1,G2),M1),C1))),V16)),V17)),V18),V19),V20)),(V21,(M2,(((M3,M4),M5),(M6,(((M7,M8),M9),M10)))))),V22);	1	2	10	22		Lots of duplication, especially in V
811	cl6027			-2		-2	((V1,((G1,G2),(((G3,G4),M1),C1))),V2);	1	4	1	2
812	cl6030	-3				-3	((((G1,G2),M1),C1),V1);	1	2	1	1
813	cl6033	-3				-3	((((G1,G2),M1),C1),V1);	1	2	1	1
814	cl6034	-3				-3	((((G1,G2),M1),C1),V1);	1	2	1	1
815	cl6055	-3				-3	((((G1,G2),M1),C1),V1);	1	2	1	1
816	cl6056	-3				-3	((((G1,G2),M1),C1),V1);	1	2	1	1
817	cl6069	-2				-2	((((G1,(G2,G3)),M1),C1),V1);	1	3	1	1	G&M mis-ordered
818a	cl6070	-2				-2	((((V1,V2),((G1,((G2,G3),M1)),C1)),(((G4,G5),M2),((G6,G7),M3))),V3);	1	3	1	1	three V-Leg clades
819	cl6072	-3				-3	((((G1,G2),M1),C1),V1);	1	2	1	1
820	cl6076	-3				-3	((M1,(((G1,G2),M2),C1)),V1);	1	2	2	1
821	cl6081	-2				-2	(((((G1,G2),M1),G3),C1),V1);	1	3	1	1
822	cl6101	-3				-3	((((G1,G2),M1),C1),V1);	1	2	1	1
823	cl6110						(((((M1,M2),M3),(((G1,(G2,M4)),G3),G4)),C1),V1);	1	4	4	1
824	cl6111						(((V1,(V2,((G1,G2),((V3,V4),(V5,((V6,V7),V8)))))),(G3,(M1,C1))),V9);	1	3	1	9
825	cl6120						((((M1,M2),C1),(G1,(((G2,G3),(G4,G5)),G6))),V1);	1	6	2	1
826	cl6128	-3				-3	((((G1,G2),(M1,M2)),C1),V1);	1	2	2	1	extra M
827	cl6136	-1				-1	((((C1,C2),(((G1,M1),M2),(G2,G3))),(G4,G5)),V1);	2	5	2	1
828	cl616	-1				-1	((C1,(((G1,M1),((G2,G3),M2)),C2)),V1);	2	3	2	1		C&C don't group together
829	cl6184						((((C1,C2),(G1,G2)),M1),V1);	2	2	1	1
830	cl6197						(((C1,((G1,(G2,M1)),M2)),C2),V1);	2	2	2	1
831	cl6198	-3				-3	((((G1,G2),M1),C1),V1);	1	2	1	1
832	cl6199						(((G1,G2),(M1,C1)),V1);	1	2	1	1
833a	cl6201	-1				-1	((((((((G1,G2),M1),(G3,((G4,G5),G6))),(V1,((C1,(G7,((G8,G9),M2))),V2))),C2),(((G10,G11),M3),(G12,G13))),V3),V4);	1	3	1	1	three V-Leg clades
834	cl6206						(((M1,(((G1,G2),G3),G4)),C1),V1);	1	4	1	1
835a	cl6213	-3				-3	(((G1,G2),((V1,(G3,C1)),((((G4,G5),M1),C2),V2))),V3);	2	5	1	3
836	cl6217	-1				-1	((((((G1,(G2,G3)),C1),C2),(M1,M2)),G4),V1);	2	4	2	1	G&M mis-ordered
837	cl6246	-3				-3	((((G1,G2),M1),C1),V1);	1	2	1	1
838	cl625	-3				-3	((((G1,G2),M1),C1),V1);	1	2	1	1
839	cl6258	-2				-2	((G1,(((G2,((G3,G4),M1)),C1),G5)),V1);	1	5	1	1
840	cl6268	-3				-3	((V1,(((G1,G2),M1),C1)),V2);	1	2	1	2
841	cl6285	-3				-3	((((G1,G2),M1),C1),V1);	1	2	1	1
842	cl6292	-3				-3	((((G1,G2),M1),C1),V1);	1	2	1	1
843	cl6293						((C1,(G1,(G2,(((G3,C2),M1),G4)))),V1);	2	4	1	1
844	cl6297						(((G1,(M1,((G2,(G3,G4)),(G5,M2)))),(((G6,G7),(M3,C1)),C2)),V1);	2	7	3	1
845	cl6302	-2				-2	(((((G1,G2),G3),M1),C1),V1);	1	3	1	1
846	cl6326	0				0	((C1,(M1,(G1,((((G2,G3),M2),M3),G4)))),V1);	1	4	3	1	G&M mis-ordered
847	cl6330	-3				-3	((((G1,G2),M1),C1),V1);	1	2	1	1
848	cl6333						(((G1,((G2,(G3,G4)),((M1,M2),C1))),V1),V2);	1	4	2	2		Generally scrambled
849	cl6342						(((M1,C1),(V1,((((G1,G2),G3),G4),G5))),V2);	1	5	1	2
850	cl6346	-1				-1	((((((G1,G2),M1),G3),(G4,G5)),C1),V1);	1	5	1	1	G&M mis-ordered
851	cl6357	-3				-3	(((G1,(G2,M1)),C1),V1);	1	2	1	1
852	cl6367						((V1,(((((G1,G2),M1),C1),M2),((G3,G4),(G5,G6)))),V2);	1	6	2	2
853	cl6386	-3				-3	((((G1,G2),M1),C1),V1);	1	2	1	1
854	cl6402	-1				-1	((((((G1,G2),M1),(G3,G4)),C1),C2),V1);	2	4	1	1		C&C don't group together
855	cl6427						(((((G1,C1),((M1,M2),G2)),(((G3,G4),M3),C2)),C3),V1);	3	4	3	1
856	cl6431		-1			-1	(((C1,C2),((G1,M1),((G2,G3),((G4,M2),M3)))),V1);	2	4	3	1	extra M
857	cl6440	0				0	((C1,(((M1,M2),((G1,G2),M3)),(G3,G4))),V1);	1	4	3	1	G&M mis-ordered
858	cl6447	-3				-3	((((G1,G2),M1),C1),V1);	1	2	1	1
859	cl6457	-3				-3	((((G1,G2),M1),C1),V1);	1	2	1	1
860	cl6474	-3				-3	((((G1,G2),M1),C1),V1);	1	2	1	1
861	cl6483	-3				-3	((((G1,G2),M1),C1),V1);	1	2	1	1
862	cl6484		-1			-1	((((G1,((G2,G3),M1)),(C1,C2)),V1),V2);	2	3	1	2	G&M mis-ordered
863	cl6492	-3				-3	((((G1,G2),M1),C1),V1);	1	2	1	1
864b	cl6498			-2		-2	((((G1,G2),M1),((((G3,G4),(((G5,G6),M2),C1)),C2),V1)),V2);	2	4	1	1	two V-Leg clades
865	cl650	-3				-3	((((G1,G2),M1),C1),V1);	1	2	1	1
866	cl6502						(((C1,(G1,(G2,(G3,(G4,G5))))),(V1,(((G6,G7),M1),M2))),V2);	1	7	2	2
867	cl652						((((G1,G2),(M1,M2)),C1),V1);	1	2	2	1
868	cl6535	-2				-2	(((G1,((G2,G3),M1)),C1),V1);	1	3	1	1
869	cl6536			-4		-4	(((G1,M1),(G2,C1)),V1);	1	2	1	1
870	cl6540	-3				-3	((((G1,G2),M1),C1),V1);	1	2	1	1
871	cl6557						(((V1,(G1,M1)),(((G2,G3),M2),(C1,M3))),V2);	1	3	3	2
872	cl6570	-3				-3	((((G1,G2),M1),C1),V1);	1	2	1	1
873	cl6587	-2				-2	(((((G1,G2),G3),M1),C1),V1);	1	3	1	1
874	cl6590			-2		-2	(((G1,G2),(((G3,G4),M1),C1)),V1);	1	4	1	1
875	cl6608			-4		-4	(((M1,C1),(G1,G2)),V1);	1	2	1	1
876	cl6612	-3				-3	((((G1,G2),M1),C1),V1);	1	2	1	1
877	cl6619	-3				-3	((((G1,G2),M1),C1),V1);	1	2	1	1
878	cl6629	-2				-2	((((G1,(G2,G3)),M1),C1),V1);	1	3	1	1
879	cl6677						((((G1,G2),((G3,C1),((G4,M1),C2))),C3),V1);	3	4	1	1
880	cl6716	-3				-3	((((G1,G2),M1),C1),V1);	1	2	1	1
881	cl6722	-3				-3	((((G1,G2),M1),C1),V1);	1	2	1	1
882	cl6730	0				0	((V1,((((G1,G2),M1),((G3,G4),M2)),C1)),V2);	1	4	2	2	complete
883	cl6746	-3				-3	((((M1,M2),(G1,G2)),C1),V1);	1	2	2	1	extra M
884	cl6764	-1				-1	(((C1,((((G1,G2),(M1,M2)),(G3,G4)),C2)),V1),V2);	2	4	2	2	extra M	C&C don't group together
885	cl6766	-2				-2	(((((G1,(G2,G3)),M1),C1),V1),V2);	1	3	1	2
886	cl6768	-3				-3	((((G1,G2),M1),C1),V1);	1	2	1	1
887	cl6770						((C1,(((((M1,(V1,(G1,((C2,C3),(G2,G3))))),M2),(G4,M3)),(G5,G6)),C4)),V2);	4	6	3	2
888	cl6781						((V1,((G1,((M1,((((G2,G3),M2),C1),V2)),G4)),G5)),V3);	1	5	2	3
889	cl68	-3				-3	((((G1,G2),M1),C1),V1);	1	2	1	1
890	cl680	-3				-3	((((G1,G2),M1),C1),V1);	1	2	1	1
891	cl6802	-1				-1	((((G1,M1),(G2,G3)),C1),V1);	1	3	1	1
892	cl6803						(((((G1,C1),M1),M2),G2),V1);	1	2	2	1
893	cl6807	-3				-3	((((G1,G2),M1),C1),V1);	1	2	1	1
894	cl6810						((G1,(G2,(C1,M1))),V1);	1	2	1	1
895	cl6825	-2				-2	((((G1,M1),(G2,G3)),C1),V1);	1	3	1	1
896	cl6829	-2				-2	((((((G1,G2),M1),G3),C1),V1),V2);	1	3	1	2
897	cl6836	-3				-3	((((G1,G2),M1),C1),V1);	1	2	1	1
898	cl6842	-3				-3	((((G1,G2),M1),C1),V1);	1	2	1	1
899	cl6850						((G1,((G2,((G3,(M1,C1)),G4)),(G5,G6))),V1);	1	6	1	1
900	cl688	-3				-3	(((G1,(G2,M1)),C1),V1);	1	2	1	1
901	cl6898	-1				-1	(((G1,G2),((((G3,G4),G5),((G6,(G7,G8)),M1)),C1)),V1);	1	8	1	1	extra G
902	cl6921	-2				-2	(((C1,((G1,(G2,G3)),M1)),V1),V2);	1	3	1	2
903	cl6934	-3				-3	((((M1,M2),(G1,G2)),C1),V1);	1	2	2	1	extra M
904	cl6951	-1				-1	((((G1,G2),((G3,G4),M1)),C1),V1);	1	4	1	1
905	cl6960						((((((V1,(V2,((G1,G2),G3))),(((G4,G5),M1),C1)),(G6,(G7,C2))),(G8,G9)),(C3,C4)),V3);	4	9	1	3
906	cl6965	-3				-3	((((G1,G2),M1),C1),V1);	1	2	1	1
907	cl6974						(((((M1,C1),M2),(G1,G2)),(G3,G4)),V1);	1	4	2	1
908	cl6989						(((((M1,C1),G1),V1),((G2,G3),C2)),V2);	2	3	1	2
909	cl6993	-3				-3	((((G1,G2),M1),C1),V1);	1	2	1	1
910	cl6994						(((C1,M1),(((G1,G2),((G3,G4),M2)),M3)),V1);	1	4	3	1
911	cl6995	-2				-2	((((M1,M2),(G1,(G2,G3))),C1),V1);	1	3	2	1	extra M
912	cl6999						((G1,(G2,(M1,C1))),V1);	1	2	1	1
913b	cl70			-1		-1	(((V1,((G1,(G2,G3)),M1)),((((G4,G5),M2),(((G6,G7),M3),C1)),V2)),V3);	1	4	2	1
914a	cl7005	-3				-3	(((V1,(((V2,((V3,(V4,((V5,(V6,(((G1,G2),M1),C1))),(V7,V8)))),(V9,V10))),V11),V12)),V13),V14);	1	2	1	14		Lots of extra Vs!
915	cl7018	0				0	((V1,((((G1,(G2,G3)),G4),(M1,M2)),C1)),V2);	1	4	2	2	G&M mis-ordered
916	cl7021						((((G1,G2),C1),((((G3,G4),M1),C2),((G5,G6),M2))),V1);	2	6	2	1
917	cl703		-1			-1	(((((G1,G2),(G3,G4)),M1),(C1,C2)),V1);	2	4	1	1
918	cl7034						((((G1,G2),C1),((G3,G4),(((M1,M2),C2),(G5,G6)))),V1);	2	6	2	1
919	cl7040						(((G1,(((G2,G3),G4),M1)),C1),V1);	1	4	1	1
920	cl7050						((M1,((((G1,(G2,G3)),C1),G4),G5)),V1);	1	5	1	1
921	cl707			-4		-4	(((G1,G2),(M1,C1)),V1);	1	2	1	1
922	cl7082						((((M1,M2),(G1,G2)),C1),V1);	1	2	2	1
923b	cl7092	-3				-3	((V1,((((G1,G2),M1),C1),C2)),V2);	1	2	1	1
924	cl7094	-2				-2	(((((G1,G2),G3),M1),C1),V1);	1	3	1	1
925	cl7096	-3				-3	((((G1,G2),M1),C1),V1);	1	2	1	1
926	cl7101				-4	-4	((((G1,M1),((G2,G3),(C1,C2))),V1),V2);	2	3	1	2
927	cl7121						((((G1,(G2,G3)),C1),(((M1,M2),V1),M3)),V2);	1	3	3	2
928	cl7137						(((G1,G2),((G3,(G4,(((M1,((((G5,G6),(G7,G8)),(G9,M2)),(G10,G11))),(V1,((((V2,(G12,((G13,M3),G14))),((V3,((((G15,G16),(G17,G18)),M4),(G19,G20))),((V4,(G21,G22)),(V5,G23)))),C1),((V6,V7),(V8,V9))))),M5))),M6)),V10);	1	23	6	10
929	cl7146	-1				-1	((((G1,G2),((G3,G4),M1)),C1),V1);	1	4	1	1
930	cl715	-3				-3	(((M1,(G1,G2)),C1),V1);	1	2	1	1
931	cl7158						(((C1,M1),(G1,G2)),V1);	1	2	1	1
932	cl7160						((((G1,G2),((M1,((G3,G4),(G5,G6))),C1)),(V1,(V2,(G7,V3)))),V4);	1	7	1	4		Messy tandems in Gm
933	cl7163						((V1,(((M1,(C1,((G1,G2),V2))),(V3,((G3,G4),C2))),C3)),V4);	3	4	1	4	three V-Leg clades
934	cl7183	-3				-3	((((M1,(G1,G2)),C1),V1),V2);	1	2	1	2
935a	cl7197	-3				-3	((((V1,(C1,((G1,G2),M1))),(M2,((G3,G4),(((V2,M3),(G5,G6)),C2)))),(((C3,M4),(G7,G8)),(G9,G10))),V3);	1	2	1	1	three V-Leg clades
936	cl72						((((G1,(M1,G2)),G3),(V1,(C1,(G4,G5)))),V2);	1	5	1	2
937	cl7203	-3				-3	(((M1,(G1,G2)),C1),V1);	1	2	1	1
938	cl7206						(((C1,(G1,G2)),(((G3,(G4,G5)),M1),V1)),V2);	1	5	1	2
939	cl7211						(((C1,C2),(((C3,((G1,(G2,G3)),(G4,((G5,M1),G6)))),C4),V1)),V2);	4	6	1	2
940	cl7212						(((G1,(G2,G3)),(M1,C1)),V1);	1	3	1	1
941	cl7220						((((M1,(C1,((G1,G2),((G3,G4),(((G5,((((M2,V1),(G6,G7)),G8),G9)),M3),(M4,M5)))))),((((C2,V2),V3),G10),G11)),V4),V5);	2	11	5	5
942	cl7227			-2		-2	(((M1,(G1,G2)),((G3,G4),C1)),V1);	1	4	1	1
943	cl7237						(((((G1,(G2,G3)),((C1,G4),((M1,C2),(C3,G5)))),G6),C4),V1);	4	6	1	1
944	cl7263						((V1,(((M1,((G1,G2),(V2,(G3,C1)))),M2),V3)),V4);	1	3	2	4
945	cl7266			-2		-2	(((C1,(G1,G2)),((G3,G4),(M1,M2))),V1);	1	4	2	1	extra M
946	cl7271	-3				-3	((V1,(((G1,G2),M1),C1)),V2);	1	2	1	2
947	cl7272	-3				-3	((C1,(M1,(G1,G2))),V1);	1	2	1	1
948	cl7275	-3				-3	(((M1,(G1,G2)),C1),V1);	1	2	1	1
949	cl7288						((((((((G1,G2),M1),(G3,G4)),V1),(C1,C2)),C3),(M2,(G5,G6))),V2);	3	6	2	2
950	cl7290	-2				-2	((((G1,(G2,G3)),M1),C1),V1);	1	3	1	1
951	cl7298	-3				-3	(((M1,(G1,G2)),C1),V1);	1	2	1	1
952	cl7299	-3				-3	((((G1,G2),M1),C1),V1);	1	2	1	1
953	cl7326	-2				-2	((((G1,G2),(M1,G3)),C1),V1);	1	3	1	1
954	cl7373	-3				-3	((C1,((G1,G2),M1)),V1);	1	2	1	1
955	cl7374	-1				-1	((C1,(((M1,M2),(G1,G2)),(G3,G4))),V1);	1	4	2	1	extra M
956b	cl7402	-3				-3	((((((G1,G2),C1),M1),C2),(V1,(C3,((G3,((G4,(G5,G6)),G7)),(M2,((M3,M4),M5)))))),V2);	1	5	4	1	extra M	Probable tandem dups in both M and G
957	cl7429			-1		-1	((V1,(((G1,G2),M1),(C1,(G3,(G4,(M2,M3)))))),V2);	1	4	3	2	extra M	Accelleration in one leg lineage?
958	cl7438	0				0	((C1,(M1,((G1,(M2,G2)),((G3,G4),(G5,G6))))),V1);	1	6	2	1	G&M mis-ordered
959	cl7463	-3				-3	(((M1,(G1,G2)),C1),V1);	1	2	1	1
960	cl7464						(((G1,G2),(C1,(((M1,M2),G3),(G4,G5)))),V1);	1	5	2	1
961	cl7485	-3				-3	((((M1,M2),(G1,G2)),C1),V1);	1	2	2	1	extra M
962	cl7488						(((C1,(G1,G2)),M1),V1);	1	2	1	1
963	cl7506						(((C1,M1),((G1,G2),G3)),V1);	1	3	1	1
964	cl7523						((((M1,((G1,G2),((G3,G4),(C1,C2)))),(C3,(((G5,G6),G7),((G8,G9),M2)))),((G10,C4),V1)),V2);	4	10	2	2
965	cl753	-1				-1	((C1,((G1,((G2,G3),(G4,G5))),M1)),V1);	1	5	1	1	G&M mis-ordered
966	cl755	-3				-3	((((G1,G2),M1),C1),V1);	1	2	1	1
967	cl7555	-3				-3	((C1,(M1,(G1,G2))),V1);	1	2	1	1
968b	cl7564	-1				-1	(((V1,(C1,(G1,G2))),(C2,(C3,((M1,(G3,G4)),(G5,G6))))),V2);	2	4	1	1		C&C don't group together
969	cl7603						((C1,(((M1,(M2,((G1,G2),G3))),G4),C2)),V1);	2	4	2	1
970	cl7637	-3				-3	((((G1,G2),M1),C1),V1);	1	2	1	1
971	cl7644						((V1,(((G1,M1),(C1,V2)),(C2,(G2,G3)))),V3);	2	3	1	3
972	cl7651	-1				-1	((((((G1,G2),G3),M1),(G4,G5)),C1),V1);	1	5	1	1	extra G
973	cl7652	-3				-3	(((M1,(G1,G2)),C1),V1);	1	2	1	1
974	cl7666	-2				-2	((((G1,(G2,G3)),M1),C1),V1);	1	3	1	1
975	cl7701						(((((((C1,(G1,G2)),M1),M2),(G3,G4)),V1),(C2,(G5,G6))),V2);	2	6	2	2
976	cl7706	-3				-3	((C1,(M1,(G1,G2))),V1);	1	2	1	1
977	cl7735	-1				-1	(((((G1,G2),M1),(G3,G4)),C1),V1);	1	4	1	1
978	cl7762						((V1,(C1,(((G1,G2),M1),(C2,(G3,G4))))),V2);	2	4	1	2
979	cl7769	-1				-1	(((((G1,G2),((G3,G4),M1)),C1),V1),V2);	1	4	1	2
980	cl7770	-3				-3	((((G1,G2),M1),C1),V1);	1	2	1	1
981	cl778	-3				-3	(((M1,(G1,G2)),C1),V1);	1	2	1	1
982	cl7793	-2				-2	((((G1,M1),(G2,M2)),C1),V1);	1	2	2	1
983	cl7796	-3				-3	(((M1,(G1,G2)),C1),V1);	1	2	1	1
984	cl7807	-3				-3	((((G1,G2),M1),C1),V1);	1	2	1	1
985	cl7808	-2				-2	((((V1,V2),(((G1,G2),((M1,M2),M3)),C1)),G3),V3);	1	3	3	3	G&M mis-ordered
986	cl7811						((((G1,(G2,G3)),(M1,M2)),C1),V1);	1	3	2	1
987	cl7812		-3			-3	((((C1,C2),(M1,(G1,G2))),V1),V2);	2	2	1	2
988	cl7819	-3				-3	((C1,(M1,(G1,G2))),V1);	1	2	1	1
989	cl7870						((V1,(((G1,M1),C1),((C2,M2),((G2,G3),C3)))),V2);	3	3	2	2
990	cl7884	-3				-3	((((G1,(G2,G3)),M1),C1),V1);	1	3	1	1
991	cl7906	-2				-2	((((G1,(G2,G3)),M1),C1),V1);	1	3	1	1
992	cl7908						(((G1,G2),(M1,C1)),V1);	1	2	1	1
993	cl7911						((((G1,((C1,V1),G2)),M1),V2),V3);	1	2	1	3
994	cl7916						((((((M1,M2),M3),G1),G2),C1),V1);	1	2	3	1
995	cl7924	-2				-2	((((M1,((G1,G2),G3)),C1),V1),V2);	1	3	1	2
996	cl7930	-3				-3	((((G1,G2),M1),C1),V1);	1	2	1	1
997	cl7939	-3				-3	((((G1,G2),M1),C1),V1);	1	2	1	1
998	cl7942	-3				-3	(((((M1,M2),(G1,G2)),C1),V1),V2);	1	2	2	2
999	cl7965			-4		-4	(((C1,(G1,G2)),M1),V1);	1	2	1	1
1000	cl7971						(((((M1,(((C1,M2),G1),(C2,M3))),C3),G2),C4),V1);	4	2	3	1		Lots of extra Cs
1001	cl7972						(((G1,M1),((C1,(M2,G2)),C2)),V1);	2	2	2	1
1002	cl8015			-4		-4	(((G1,G2),(C1,M1)),V1);	1	2	1	1
1003	cl8033	-3				-3	((C1,((G1,G2),(M1,M2))),V1);	1	2	2	1	extra M
1004	cl804	0				0	((((M1,(G1,G2)),(M2,(G3,(G4,G5)))),C1),V1);	1	5	2	1	extra G
1005	cl8042			-4		-4	((V1,(M1,((G1,G2),C1))),V2);	1	2	1	2
1006	cl8045			-4		-4	((M1,(C1,(G1,G2))),V1);	1	2	1	1
1007	cl805			-2		-2	(((V1,((G1,G2),((M1,(G3,G4)),C1))),(G5,(C2,G6))),V2);	1	4	1	1
1008	cl8085			-2		-2	(((G1,G2),((M1,(G3,G4)),C1)),V1);	1	4	1	1
1009	cl8086						(((G1,G2),(((V1,(((M1,(V2,(G3,G4))),((V3,((G5,(G6,(M2,(G7,G8)))),(V4,(M3,C1)))),((G9,(G10,G11)),C2))),(((((C3,((G12,G13),G14)),V5),V6),(C4,((G15,G16),(G17,G18)))),((G19,G20),(M4,G21))))),(G22,G23)),(C5,(G24,G25)))),V7);	5	25	4	7
1010	cl8090						((G1,(G2,(M1,C1))),V1);	1	2	1	1
1011	cl8092						((((C1,((G1,G2),(G3,G4))),(M1,M2)),V1),V2);	1	4	2	2
1012	cl8094	-3				-3	((((G1,G2),M1),C1),V1);	1	2	1	1
1013	cl8104						(((G1,G2),(((((G3,G4),((C1,(M1,C2)),G5)),(G6,G7)),C3),M2)),V1);	3	7	2	1
1014	cl8111	-3				-3	(((M1,(G1,G2)),C1),V1);	1	2	1	1
1015	cl8113						(((C1,(G1,G2)),((((M1,M2),(G3,G4)),C2),C3)),V1);	3	4	2	1
1016	cl8128						(((((G1,C1),C2),(G2,G3)),(((M1,(G4,G5)),C3),C4)),V1);	4	5	1	1
1017	cl8147						(((((((((G1,G2),((M1,(M2,(M3,M4))),(M5,(M6,M7)))),C1),(G3,G4)),C2),V1),V2),V3),V4);	2	4	7	4		Lots of tandems, esp in M
1018	cl8150						(((C1,((M1,M2),G1)),G2),V1);	1	2	2	1
1019	cl8154	-3				-3	((C1,((G1,G2),M1)),V1);	1	2	1	1
1020	cl8159			-3		-3	(((C1,(M1,(G1,G2))),(G3,G4)),V1);	1	4	1	1
1021	cl8164	-3				-3	((((G1,G2),M1),C1),V1);	1	2	1	1
1022	cl8166						((((G1,G2),M1),(C1,G3)),V1);	1	3	1	1
1023	cl8181	-1				-1	((C1,(M1,((G1,G2),(G3,G4)))),V1);	1	4	1	1	G&M mis-ordered
1024	cl8184	-1				-1	(((((G1,(G2,G3)),(M1,(M2,M3))),(G4,M4)),C1),V1);	1	4	4	1	G&M mis-ordered
1025	cl820	-3				-3	(((M1,(G1,G2)),C1),V1);	1	2	1	1
1026	cl8223			-1		-1	(((M1,(G1,G2)),(C1,((G3,G4),M2))),V1);	1	4	2	1
1027	cl8235	-3				-3	((C1,(M1,(G1,G2))),V1);	1	2	1	1
1028	cl8239						((((M1,(G1,M2)),C1),(C2,(M3,G2))),V1);	2	2	3	1
1029	cl8242	-3				-3	(((C1,((G1,G2),M1)),V1),V2);	1	2	1	2
1030	cl8246			-3		-3	((G1,(((G2,G3),M1),C1)),V1);	1	3	1	1
1031	cl8250	-2				-2	(((M1,((G1,G2),G3)),C1),V1);	1	3	1	1
1032	cl8251	-3				-3	(((M1,(G1,G2)),C1),V1);	1	2	1	1
1033	cl8257	-3				-3	((((G1,G2),M1),C1),V1);	1	2	1	1
1034	cl8260						((V1,(((M1,(G1,G2)),V2),((G3,G4),(C1,C2)))),V3);	2	4	1	3
1035	cl8261	-1				-1	(((M1,((G1,G2),(G3,G4))),C1),V1);	1	4	1	1
1036	cl8271	-3				-3	((((G1,G2),(M1,M2)),C1),V1);	1	2	2	1	extra M
1037	cl8301	-3				-3	((V1,((M1,(G1,G2)),C1)),V2);	1	2	1	2
1038	cl8315			-3		-3	(((M1,G1),((G2,G3),C1)),V1);	1	3	1	1
1039	cl8337						((((M1,(((G1,G2),(G3,G4)),(G5,G6))),((((M2,(G7,G8)),C1),V1),C2)),(C3,(G9,((V2,(M3,M4)),G10)))),V3);	3	10	4	3
1040	cl834						(((C1,(G1,G2)),M1),V1);	1	2	1	1
1041	cl8362						(((V1,((M1,G1),C1)),(C2,(G2,G3))),V2);	2	3	1	2
1042	cl8364						((V1,((((C1,M1),C2),M2),(G1,G2))),V2);	2	2	2	2
1043	cl837						(((C1,M1),(G1,G2)),V1);	1	2	1	1
1044	cl8385	-1				-1	(((M1,(G1,(G2,(G3,(G4,G5))))),C1),V1);	1	5	1	1	extra G
1045	cl8397			-4		-4	(((G1,G2),(C1,M1)),V1);	1	2	1	1
1046	cl8411						((((((G1,G2),((G3,G4),G5)),(C1,G6)),(((G7,(G8,G9)),(G10,G11)),M1)),V1),V2);	1	11	1	2
1047	cl8416						(((V1,V2),(((((G1,G2),M1),(C1,(C2,(V3,C3)))),V4),C4)),V5);	4	2	1	5
1048	cl8430	-3				-3	((((G1,G2),M1),C1),V1);	1	2	1	1
1049	cl8433	-3				-3	(((M1,(G1,G2)),C1),V1);	1	2	1	1
1050a	cl8439	-2				-2	(((V1,((C1,((M1,G1),(G2,G3))),V2)),((G4,G5),((G6,G7),M2))),V3);	1	3	1	1
1051	cl8441						((G1,(G2,(((G3,G4),((M1,(M2,M3)),C1)),(V1,V2)))),V3);	1	4	3	3
1052	cl8467						((((M1,M2),(G1,G2)),C1),V1);	1	2	2	1
1053	cl8469						((M1,(C1,(G1,((M2,(M3,M4)),G2)))),V1);	1	2	4	1
1054	cl8477	-3				-3	(((M1,(G1,G2)),C1),V1);	1	2	1	1
1055	cl8478			-4		-4	(((C1,(G1,G2)),M1),V1);	1	2	1	1
1056	cl8499						((((((G1,G2),C1),(G3,G4)),M1),V1),V2);	1	4	1	2
1057	cl850	-3				-3	((((G1,G2),M1),C1),V1);	1	2	1	1
1058	cl851						(((G1,((M1,(G2,G3)),(G4,M2))),C1),V1);	1	4	2	1
1059	cl8514	-3				-3	((((G1,G2),M1),C1),V1);	1	2	1	1
1060	cl8520	-3				-3	((V1,(V2,((M1,(G1,G2)),C1))),V3);	1	2	1	3
1061	cl8521	-3				-3	(((G1,(G2,M1)),C1),V1);	1	2	1	1
1062	cl8522	-3				-3	(((M1,(G1,G2)),C1),V1);	1	2	1	1
1063	cl8525	0				0	(((C1,(((G1,G2),M1),(M2,(G3,(G4,G5))))),C2),V1);	2	5	2	1	extra G	C&C don't group together
1064	cl8534	-3				-3	((((G1,G2),M1),C1),V1);	1	2	1	1
1065	cl8535						((((G1,G2),(G3,M1)),C1),V1);	1	3	1	1
1066	cl8538	-3				-3	(((M1,(G1,G2)),C1),V1);	1	2	1	1
1067	cl8539	-3				-3	(((M1,(G1,G2)),C1),V1);	1	2	1	1
1068	cl8575	-3				-3	((((G1,G2),M1),C1),V1);	1	2	1	1
1069	cl8576	-3				-3	((((G1,G2),M1),C1),V1);	1	2	1	1
1070	cl8580	-3				-3	(((M1,(G1,G2)),C1),V1);	1	2	1	1
1071	cl8590	-3				-3	((((G1,G2),M1),C1),V1);	1	2	1	1
1072	cl8603	-3				-3	(((M1,(G1,G2)),C1),V1);	1	2	1	1
1073	cl8610	-3				-3	((((G1,G2),M1),C1),V1);	1	2	1	1
1074	cl8626	-3				-3	(((M1,(G1,G2)),C1),V1);	1	2	1	1
1075	cl8629	-3				-3	((C1,((G1,G2),M1)),V1);	1	2	1	1
1076a	cl8637	-1				-1	(((V1,(C1,((G1,G2),(M1,(G3,G4))))),(G5,G6)),V2);	1	4	1	1
1077	cl8639	-3				-3	(((M1,(G1,G2)),C1),V1);	1	2	1	1
1078	cl8652	-1				-1	((C1,((G1,G2),((G3,G4),M1))),V1);	1	4	1	1
1079	cl8653	-2				-2	((C1,(M1,((G1,G2),G3))),V1);	1	3	1	1
1080	cl8659	-1				-1	(((((G1,(G2,G3)),G4),M1),C1),V1);	1	4	1	1
1081	cl869	-3				-3	((((G1,G2),M1),C1),V1);	1	2	1	1
1082	cl8690			-1		-1	((((M1,(G1,G2)),(C1,((M2,M3),(G3,G4)))),C2),V1);	2	4	3	1	extra M
1083	cl8699	-3				-3	(((M1,(G1,G2)),C1),V1);	1	2	1	1
1084	cl8720						((V1,((((G1,(G2,G3)),(M1,M2)),C1),(G4,(((G5,G6),V2),C2)))),V3);	2	6	2	3
1085	cl8733	-3				-3	((((M1,(G1,G2)),C1),V1),V2);	1	2	1	2
1086	cl8737						(((C1,(G1,G2)),((C2,(G3,M1)),V1)),V2);	2	3	1	2
1087	cl8741						(((C1,(G1,((G2,G3),((G4,G5),G6)))),(C2,(M1,G7))),V1);	2	7	1	1
1088	cl8744	-3				-3	((C1,(M1,(G1,G2))),V1);	1	2	1	1
1089	cl8754			-2		-2	(((G1,G2),(C1,(M1,(G3,G4)))),V1);	1	4	1	1
1090	cl8758			-4		-4	((M1,((G1,G2),C1)),V1);	1	2	1	1
1091	cl8763	-2				-2	((((G1,(G2,G3)),M1),C1),V1);	1	3	1	1
1092	cl8779						((C1,(((G1,G2),M1),M2)),V1);	1	2	2	1
1093	cl879	-3				-3	(((M1,(G1,G2)),C1),V1);	1	2	1	1
1094	cl8798			-2		-2	(((((M1,(G1,G2)),C1),(G3,G4)),C2),V1);	2	4	1	1		C&C don't group together
1095	cl8812	-3				-3	((V1,(((G1,G2),M1),C1)),V2);	1	2	1	2
1096	cl8827	-2				-2	((C1,(((M1,M2),M3),((M4,M5),(G1,G2)))),V1);	1	2	5	1	extra M
1097	cl8828	-3				-3	(((M1,(G1,G2)),C1),V1);	1	2	1	1
1098	cl8829	-3				-3	(((M1,(G1,G2)),C1),V1);	1	2	1	1
1099	cl8832	-3				-3	((((M1,(G1,G2)),C1),V1),V2);	1	2	1	2
1100	cl8860	-1				-1	((C1,((M1,(G1,G2)),(((G3,G4),G5),(G6,G7)))),V1);	1	7	1	1	extra G
1101	cl888	-3				-3	((((G1,G2),M1),C1),V1);	1	2	1	1
1102	cl8888						(((C1,(M1,M2)),(G1,G2)),V1);	1	2	2	1
1103	cl8900						((M1,(((G1,(C1,G2)),M2),M3)),V1);	1	2	3	1
1104	cl8909	-3				-3	(((M1,(G1,G2)),C1),V1);	1	2	1	1
1105	cl892		-2			-2	(((C1,C2),((G1,G2),(M1,G3))),V1);	2	3	1	1
1106a	cl8933	-3				-3	(((G1,G2),((((G3,G4),M1),C1),V1)),V2);	1	2	1	1
1107a	cl8934	-2				-2	((((C1,(M1,(G1,(G2,G3)))),(C2,G4)),(G5,(G6,G7))),V1);	1	3	1	1		Probably three V-L clades, but only one V remains.
1108	cl8944	-3				-3	(((M1,(G1,G2)),C1),V1);	1	2	1	1
1109	cl8951	-1				-1	((((M1,(G1,G2)),(G3,G4)),C1),V1);	1	4	1	1
1110	cl8957	-3				-3	(((M1,(G1,G2)),C1),V1);	1	2	1	1
1111	cl8971	0				0	((V1,((M1,(G1,(G2,(G3,(G4,(M2,G5)))))),C1)),V2);	1	5	2	2	G&M mis-ordered
1112	cl8981	-3				-3	((V1,(((G1,G2),M1),C1)),V2);	1	2	1	2
1113	cl8987			-4		-4	(((C1,(G1,G2)),M1),V1);	1	2	1	1
1114	cl9003	-3				-3	((C1,((G1,G2),M1)),V1);	1	2	1	1
1115	cl9012	-3				-3	((((G1,G2),M1),C1),V1);	1	2	1	1
1116	cl9018	-3				-3	(((M1,(G1,G2)),C1),V1);	1	2	1	1
1117	cl9024	-3				-3	((C1,((G1,G2),M1)),V1);	1	2	1	1
1118	cl9038	-3				-3	((((G1,G2),M1),C1),V1);	1	2	1	1
1119	cl9041	-3				-3	(((C1,(M1,(G1,G2))),V1),V2);	1	2	1	2
1120	cl9043	-3				-3	(((M1,(G1,G2)),C1),V1);	1	2	1	1
1121	cl9045	-2				-2	(((M1,((G1,G2),M2)),C1),V1);	1	2	2	1
1122	cl9050						((V1,((((G1,(G2,G3)),((G4,G5),M1)),(C1,C2)),(G6,(G7,((G8,G9),G10))))),V2);	2	10	1	2
1123	cl9052	-3				-3	(((M1,(G1,G2)),C1),V1);	1	2	1	1
1124	cl9068	-2				-2	((((M1,(G1,(G2,G3))),C1),V1),V2);	1	3	1	2
1125	cl9095			-2		-2	((((G1,G2),(C1,(M1,(G3,G4)))),V1),V2);	1	4	1	2
1126	cl9106	-3				-3	(((M1,(G1,G2)),C1),V1);	1	2	1	1
1127	cl9109	-1				-1	((C1,((M1,(G1,G2)),((G3,G4),G5))),V1);	1	5	1	1	extra G
1128	cl9117	-2				-2	((((G1,(G2,(G3,G4))),M1),C1),V1);	1	4	1	1	extra G
1129	cl9120	-2				-2	((C1,(M1,((G1,G2),G3))),V1);	1	3	1	1
1130	cl9125	-3				-3	((C1,(M1,(G1,G2))),V1);	1	2	1	1
1131	cl9128			-3		-3	(((G1,M1),((G2,G3),C1)),V1);	1	3	1	1
1132a	cl9131	-1				-1	(((((C1,((G1,G2),((G3,G4),M1))),((G5,G6),V1)),((((((M2,(G7,G8)),(M3,((G9,G10),((G11,G12),((G13,G14),(G15,(G16,G17))))))),(V2,(V3,((G18,G19),(G20,G21))))),(M4,((G22,G23),(G24,G25)))),(G26,G27)),(G28,G29))),V4),V5);	1	4	1	1
1133	cl914						((((C1,M1),(G1,G2)),(G3,G4)),V1);	1	4	1	1
1134	cl9146	-3				-3	(((M1,(G1,G2)),C1),V1);	1	2	1	1
1135	cl9147	-3				-3	((C1,(M1,(G1,G2))),V1);	1	2	1	1
1136	cl9162	-3				-3	((((G1,G2),M1),C1),V1);	1	2	1	1
1137b	cl9169			-2		-2	(((C1,(((G1,G2),M1),((V1,(G3,(G4,G5))),V2))),((((G6,G7),M2),(C2,(M3,(G8,G9)))),C3)),V3);	2	4	1	1		C&C don't group together
1138	cl9174						((G1,(((G2,G3),M1),C1)),V1);	1	3	1	1
1139	cl9180	-3				-3	(((M1,(G1,G2)),C1),V1);	1	2	1	1
1140	cl9187	-3				-3	((((G1,G2),M1),C1),V1);	1	2	1	1
1141	cl9196	-3				-3	((((G1,G2),M1),C1),V1);	1	2	1	1
1142	cl9207						(((((C1,(G1,(G2,G3))),G4),(G5,((G6,G7),(M1,G8)))),C2),V1);	2	8	1	1
1143	cl9218						(((G1,G2),((((G3,G4),(M1,M2)),M3),(C1,(G5,G6)))),V1);	1	6	3	1
1144	cl9221	-1				-1	((C1,((G1,G2),((G3,G4),M1))),V1);	1	4	1	1
1145	cl9223	-3				-3	(((M1,(G1,G2)),C1),V1);	1	2	1	1
1146	cl9231			-3		-3	(((M1,(G1,G2)),(C1,G3)),V1);	1	3	1	1
1147	cl9234	-3				-3	(((C1,(M1,(G1,G2))),C2),V1);	2	2	1	1
1148	cl9239	-1				-1	((C1,((G1,(G2,G3)),(M1,(G4,G5)))),V1);	1	5	1	1	extra G
1149	cl9241	-1				-1	((C1,((M1,(G1,G2)),(G3,G4))),V1);	1	4	1	1
1150	cl9256	-1				-1	((((((G1,(G2,G3)),M1),(G4,G5)),C1),V1),V2);	1	5	1	2	extra G
1151a	cl926			-1		-1	(((((V1,V2),(((V3,V4),(((G1,(G2,G3)),(((G4,G5),((G6,G7),(M1,(M2,M3)))),((M4,G8),((G9,G10),M5)))),(V5,((G11,G12),(M6,G13))))),((C1,((G14,G15),(M7,M8))),(M9,(G16,G17))))),V6),V7),V8);	1	17	9	8	extra M
1152	cl9267						(((V1,(M1,G1)),((((G2,G3),(C1,M2)),M3),(G4,G5))),V2);	1	5	3	2
1153	cl9268	-2				-2	((C1,(M1,((G1,G2),M2))),V1);	1	2	2	1
1154	cl9269						((((M1,G1),C1),G2),V1);	1	2	1	1
1155	cl9284						((M1,((M2,(G1,G2)),C1)),V1);	1	2	2	1
1156	cl9285	-3				-3	((((M1,M2),(G1,G2)),C1),V1);	1	2	2	1	extra M
1157	cl9297	-3				-3	(((M1,(G1,G2)),C1),V1);	1	2	1	1
1158	cl9298			-4		-4	(((G1,G2),(M1,C1)),V1);	1	2	1	1
1159	cl9301	-2				-2	((((G1,(G2,G3)),(M1,M2)),C1),V1);	1	3	2	1
1160	cl9305						((((((G1,G2),G3),(C1,C2)),M1),G4),V1);	2	4	1	1
1161	cl9312	-3				-3	(((M1,(G1,G2)),C1),V1);	1	2	1	1
1162	cl9333						(((M1,M2),(C1,(G1,(M3,G2)))),V1);	1	2	3	1
1163	cl9370						((((C1,(M1,(G1,G2))),M2),(G3,(C2,C3))),V1);	3	3	2	1
1164	cl9398						(((G1,G2),((G3,G4),(C1,M1))),V1);	1	4	1	1
1165	cl9403		-3			-3	(((M1,(G1,G2)),(C1,C2)),V1);	2	2	1	1
1166	cl9407						(((G1,G2),(G3,(C1,M1))),V1);	1	3	1	1
1167	cl9409	-1				-1	(((M1,((G1,((G2,G3),G4)),(G5,G6))),C1),V1);	1	6	1	1	extra G
1168	cl9412	-3				-3	((C1,((G1,G2),M1)),V1);	1	2	1	1
1169	cl9413	-3				-3	((C1,((G1,G2),M1)),V1);	1	2	1	1
1170	cl9423	-3				-3	(((M1,(G1,G2)),C1),V1);	1	2	1	1
1171	cl943						(((G1,M1),(((((G2,G3),((G4,(G5,G6)),(G7,G8))),C1),M2),V1)),V2);	1	8	2	2
1172	cl9430						((((C1,M1),V1),(V2,(G1,G2))),V3);	1	2	1	3
1173	cl944	-3				-3	((((G1,G2),M1),C1),V1);	1	2	1	1
1174	cl9444						(((C1,((G1,G2),(M1,M2))),(G3,G4)),V1);	1	4	2	1
1175	cl9449	-3				-3	(((M1,(G1,G2)),C1),V1);	1	2	1	1
1176	cl9452	-3				-3	((C1,(M1,(G1,G2))),V1);	1	2	1	1
1177	cl9455	-3				-3	(((M1,(G1,G2)),C1),V1);	1	2	1	1
1178	cl9458	-3				-3	(((M1,(G1,G2)),C1),V1);	1	2	1	1
1179	cl9462						(((V1,V2),((V3,V4),(((((G1,(V5,(V6,(((V7,V8),(V9,(V10,(V11,(V12,(V13,(V14,V15))))))),(V16,V17))))),((G2,G3),C1)),(V18,V19)),(G4,(G5,(G6,G7)))),((((M1,(G8,(M2,(G9,M3)))),((G10,G11),((M4,M5),G12))),G13),(((G14,G15),G16),((G17,G18),(G19,G20))))))),V20);	1	20	5	20		Lots of tandems, esp in V
1180	cl9470						(((C1,(M1,G1)),G2),V1);	1	2	1	1
1181	cl9484						(((V1,(M1,G1)),(C1,(G2,G3))),V2);	1	3	1	2
1182	cl9491	-3				-3	((((G1,G2),M1),C1),V1);	1	2	1	1
1183	cl9493						((((M1,(G1,G2)),((M2,((G3,G4),G5)),(C1,((G6,G7),(G8,G9))))),(V1,(((G10,G11),(M3,(G12,G13))),(((G14,G15),((M4,M5),(((G16,G17),G18),G19))),V2)))),V3);	1	19	5	3
1184	cl9494	0				0	((((M1,(G1,G2)),(M2,(G3,G4))),C1),V1);	1	4	2	1	complete
1185	cl95	-3				-3	((((G1,G2),M1),C1),V1);	1	2	1	1
1186	cl9503	-3				-3	(((M1,(G1,G2)),C1),V1);	1	2	1	1
1187	cl9517						((((M1,G1),G2),C1),V1);	1	2	1	1
1188	cl952	-1				-1	((C1,((M1,M2),((G1,G2),G3))),V1);	1	3	2	1
1189	cl9525						((C1,(V1,(M1,(G1,G2)))),V2);	1	2	1	2
1190	cl9535	-3				-3	((((G1,G2),M1),C1),V1);	1	2	1	1
1191	cl9537	-3				-3	(((C1,((G1,G2),M1)),C2),V1);	2	2	1	1
1192	cl9554	-3				-3	((((G1,G2),(M1,M2)),C1),V1);	1	2	2	1	extra M
1193	cl9555						(((((C1,M1),(G1,G2)),C2),(G3,G4)),V1);	2	4	1	1
1194	cl9566	-3				-3	((((G1,G2),M1),C1),V1);	1	2	1	1
1195	cl9593						((((V1,C1),C2),(((G1,G2),G3),M1)),V2);	2	3	1	2
1196	cl9595						(((((G1,G2),C1),(C2,M1)),C3),V1);	3	2	1	1
1197	cl9599						(((((C1,G1),(M1,C2)),(C3,G2)),C4),V1);	4	2	1	1		Extra C, and odd topology
1198	cl9604			-4		-4	(((G1,G2),(C1,M1)),V1);	1	2	1	1
1199	cl9605	-3				-3	(((M1,(G1,G2)),C1),V1);	1	2	1	1
1200	cl9611						((((G1,G2),M1),((M2,(C1,((G3,G4),(G5,(V1,G6))))),V2)),V3);	1	6	2	3
1201	cl9620						(((V1,(C1,(M1,(C2,(G1,G2))))),((G3,G4),C3)),V2);	3	4	1	2
1202	cl9621	-2				-2	((C1,((M1,(G1,G2)),G3)),V1);	1	3	1	1
1203	cl9622	-3				-3	(((C1,(C2,(M1,(G1,G2)))),V1),V2);	2	2	1	2
1204	cl9623						(((G1,M1),C1),V1);	1	1	1	1
1205	cl9624			-4		-4	(((G1,G2),(C1,M1)),V1);	1	2	1	1
1206	cl963			-2		-2	(((C1,((G1,G2),M1)),(G3,G4)),V1);	1	4	1	1
1207	cl9632	-3				-3	(((M1,(G1,G2)),C1),V1);	1	2	1	1
1208	cl9637	-2				-2	(((((G1,(G2,G3)),(M1,M2)),C1),V1),V2);	1	3	2	2
1209	cl964	-1				-1	((((G1,G2),(M1,(G3,G4))),C1),V1);	1	4	1	1
1210	cl9640	-3				-3	((C1,((G1,G2),M1)),V1);	1	2	1	1
1211	cl9645			-1		-1	(((M1,(G1,G2)),(C1,(G3,(M2,M3)))),V1);	1	3	3	1
1212	cl9649	-3				-3	((((G1,G2),M1),C1),V1);	1	2	1	1
1213	cl9656						((((V1,M1),((G1,G2),C1)),G3),V2);	1	3	1	2
1214	cl9661	-3				-3	((((G1,G2),M1),C1),V1);	1	2	1	1
1215	cl9674			-4		-4	(((M1,M2),((G1,G2),C1)),V1);	1	2	2	1
1216	cl9676	-3				-3	((C1,(M1,(G1,G2))),V1);	1	2	1	1
1217	cl9686			-2		-2	((V1,(((M1,(G1,G2)),C1),(G3,M2))),V2);	1	3	2	2
1218	cl9687						((V1,(V2,(((G1,G2),M1),C1))),V3);	1	2	1	3
1219	cl9696	-3				-3	(((M1,(G1,G2)),C1),V1);	1	2	1	1
1220a	cl97	0				0	((((((((G1,G2),M1),((G3,G4),M2)),C1),V1),V2),((G5,G6),((G7,G8),M3))),V3);	1	8	3	3
1221	cl9709	-1				-1	((((M1,(G1,G2)),(G3,G4)),C1),V1);	1	4	1	1
1222	cl9737	-3				-3	((((G1,G2),M1),C1),V1);	1	2	1	1
1223	cl974	-3				-3	((((G1,G2),M1),C1),V1);	1	2	1	1
1224	cl9740	-3				-3	((((G1,G2),(M1,M2)),C1),V1);	1	2	2	1	extra M
1225	cl9742	-3				-3	((((M1,(G1,G2)),C1),V1),V2);	1	2	1	2
1226	cl9744						((((G1,G2),C1),M1),V1);	1	2	1	1
1227	cl9751	-3				-3	((C1,(M1,(G1,G2))),V1);	1	2	1	1
1228	cl9756						((((((M1,M2),((G1,G2),(G3,G4))),(((G5,V1),(V2,((G6,G7),((G8,G9),(C1,M3))))),((V3,(M4,(((G10,G11),G12),(G13,(G14,G15))))),((G16,G17),((G18,G19),C2))))),(V4,(G20,G21))),(((V5,(G22,(G23,(G24,(((G25,G26),G27),G28))))),V6),(((G29,G30),(G31,M5)),(((G32,G33),(G3	3	34	6	7
1229	cl9791	-3				-3	(((((G1,G2),M1),C1),V1),V2);	1	2	1	2
1230	cl9793	-3				-3	((((G1,G2),M1),C1),V1);	1	2	1	1
1231	cl9803	-2				-2	(((M1,(M2,(G1,G2))),C1),V1);	1	2	2	1
1232	cl9820	-3				-3	((C1,(M1,(G1,G2))),V1);	1	2	1	1
1233	cl9834	-3				-3	((((G1,G2),M1),C1),V1);	1	2	1	1
1234	cl9843			-2		-2	((((G1,G2),(M1,M2)),(C1,(G3,G4))),V1);	1	4	2	1	extra M
1235	cl9845						(((G1,M1),((M2,G2),(C1,(M3,G3)))),V1);	1	3	3	1
1236	cl9849						((((M1,G1),G2),C1),V1);	1	2	1	1
1237	cl9878	-3				-3	(((M1,(G1,G2)),C1),V1);	1	2	1	1
1238	cl9890	-3				-3	((((G1,G2),M1),C1),V1);	1	2	1	1
1239	cl9916						(((((G1,G2),(G3,G4)),(M1,((((M2,(M3,(M4,(M5,M6)))),M7),M8),M9))),C1),V1);	1	4	9	1
1240	cl9930						(((C1,(G1,(G2,G3))),M1),V1);	1	3	1	1
1241	cl9931	-3				-3	(((M1,(G1,G2)),C1),V1);	1	2	1	1
1242	cl9941			-4		-4	(((C1,M1),(G1,G2)),V1);	1	2	1	1
1243a	cl996			-4		-4	((V1,((((G1,G2),(C1,M1)),V2),(G3,G4))),V3);	1	2	1	1
1244	cl9963	-3				-3	((((G1,G2),M1),C1),V1);	1	2	1	1
1245	cl9964	-3				-3	((C1,(M1,(G1,G2))),V1);	1	2	1	1
1246	cl9967			-2		-2	((((G1,G2),M1),(C1,(G3,G4))),V1);	1	4	1	1
1247	cl997						((M1,(M2,(C1,(G1,G2)))),V1);	1	2	2	1
1248	cl999	-3				-3	((((G1,G2),M1),C1),V1);	1	2	1	1
1249	cl9997						(((C1,C2),(V1,((G1,G2),M1))),V2);	2	2	1	2
seqs missing:	0	31	2	2	0
seqs missing:	-1	128	4	14	0
seqs missing:	-2	116	3	34	0
seqs missing:	-3	493	5	19	1
sum 0-1		159	6	16	0	181
sum 0-3		768	14	69	1	852
